# Supplementary material for: Integrated metagenomics identifies a crucial role for trimethylamine-producing Lachnoclostridium in promoting atherosclerosis
Source: PubMed Central journal article supplement (PMC8913745; doi:10.1038/s41522-022-00273-4), 2022-03-10
Supplement: 41522_2022_273_MOESM1_ESM.pdf [file 41522_2022_273_MOESM1_ESM.pdf]

## Supplementary Material

### Integrated metagenomics identifies a crucial role for trimethylamine-producing *Lachnoclostridium* in promoting atherosclerosis

Yuan-Yuan Cai <sup>ab#</sup>, Feng-Qing Huang <sup>b#</sup>, Xingzhen Lao <sup>a</sup>, Yawen Lu <sup>b</sup>, Xuejiao Gao <sup>c</sup>, Raphael N. Alolga <sup>b</sup>, Kunpeng Yin <sup>b</sup>, Xingchen Zhou<sup>a</sup>, Yun Wang <sup>a</sup>, Baolin Liu <sup>b</sup>, Jing Shang <sup>b\*</sup>, Lian-Wen Qi <sup>b\*</sup>, Jing Li <sup>abd\*</sup>

<sup>a</sup>School of Life Science and Technology, China Pharmaceutical University, Nanjing 210009, China; <sup>b</sup> State Key Laboratory of Natural Medicines, School of traditional Chinese Pharmacy, China Pharmaceutical University, Nanjing 210009, China; <sup>c</sup> Affiliated Hospital of Integrated Traditional Chinese and Western Medicine, Nanjing University of Chinese Medicine, Nanjing 210028, China; <sup>d</sup> Key Laboratory of Drug Quality Control and Pharmacovigilance (China Pharmaceutical University), Ministry of Education, Nanjing 210009, China.

\*corresponding author: Jing Li, e-mail: lijing@cpu.edu.cn; Lian-Wen Qi, e-mail: Qilw@cpu.edu.cn; or Jing Shang, e-mail: shangjing21cn@163.com.

#These authors contributed equally to this work.

a.

***cntA***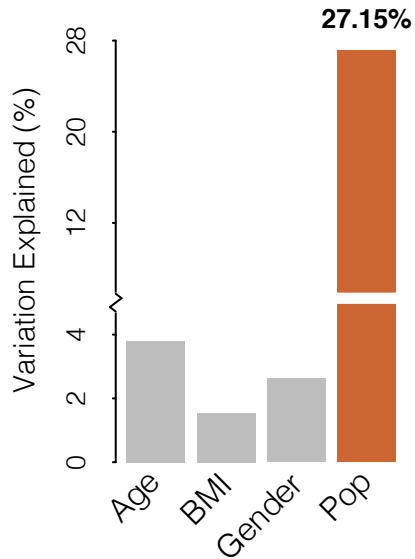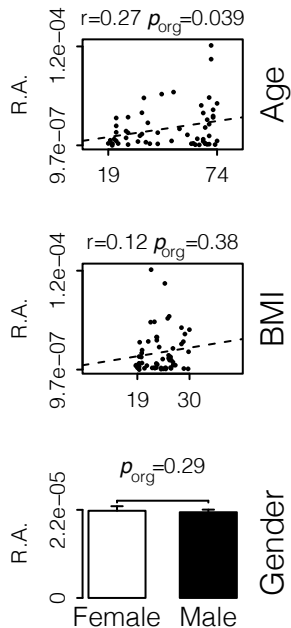

b.

***cutC***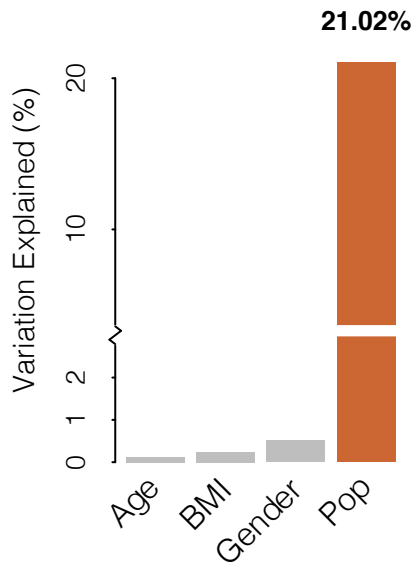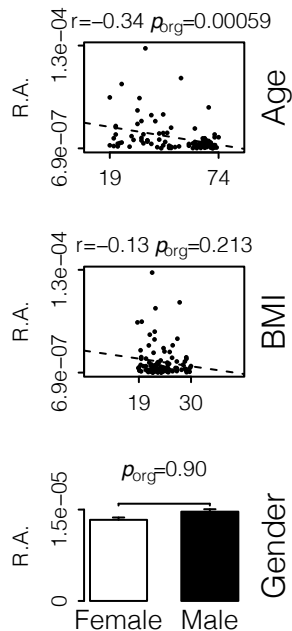

17 **Figure 1.** Multivariate analysis of covariance of *cntA* (**a**) and *cutC* (**b**) based on public  
18 metagenomes. Barplots show the sequence relative abundances against binary variables (i.e.  
19 gender), Error bars denote the means  $\pm$  s.e.m.  $p_{\text{org}}$  indicates the significance conducted by Mann-  
20 Whitney-Wilcoxon test; scatterplots indicate the pearson correlation between sequence relative  
21 abundances and continuous variables (i.e. age and BMI),  $p_{\text{org}}$  indicates the correlation significance.

22

23

24

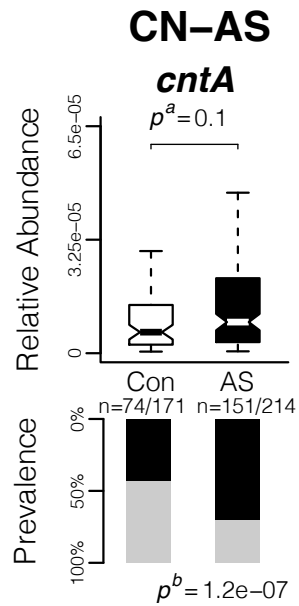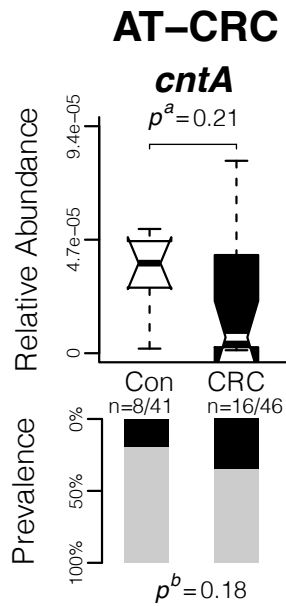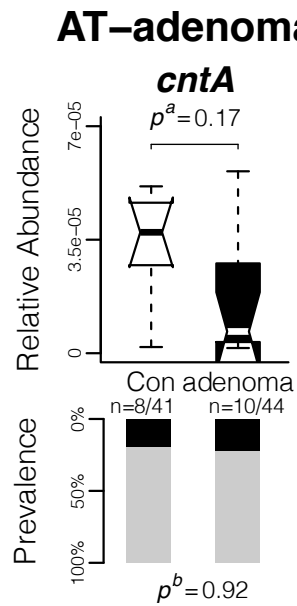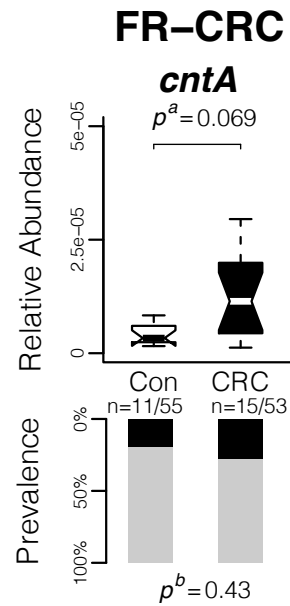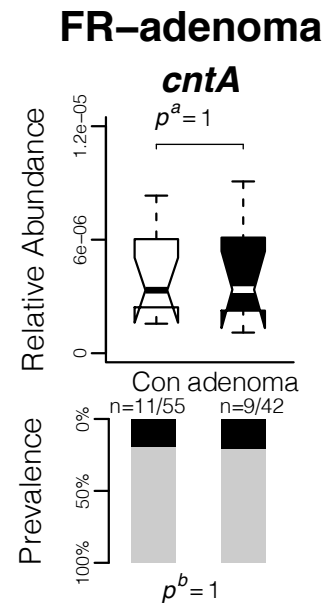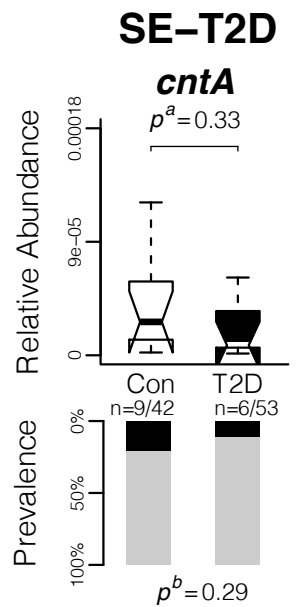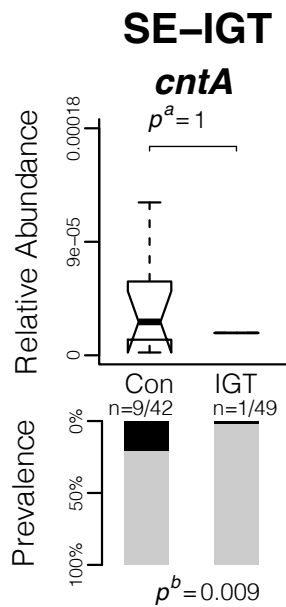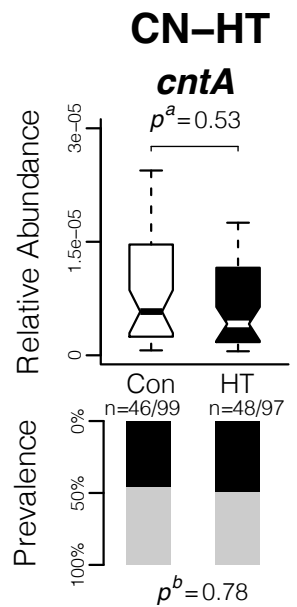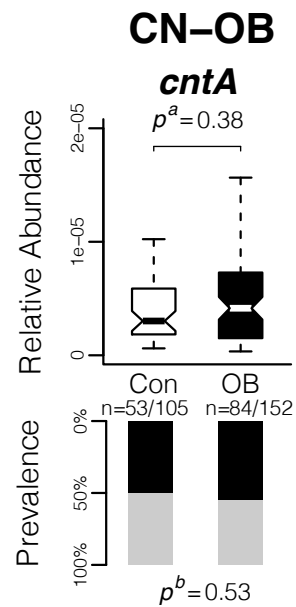

25 **Figure 2.** Relative abundance distribution of *cntA* in multiple case- control cohorts in the upper  
26 panel. Significant differences were conducted by Mann-Whitney-Wilcoxon test ( $p^a$ ). The bounds  
27 denote the interquartile range between the first and third quartiles and the center line denotes the  
28 median. The whiskers denote the lowest and highest value. Bar plots in the lower panel show the  
29 prevalence difference in multiple case-control cohorts. Significant differences were conducted by  
30 Chi-squared test ( $p^b$ ). CN-AS: atherosclerosis from China; AT-CRC: colorectal cancer from  
31 Austria; AT-adenoma: adenoma from Austria; FR-CRC: colorectal cancer from France; FR-  
32 adenoma: adenoma from France; SE-T2D: type 2 diabetes from Sweden; SE-IGT: impaired  
33 glucose tolerance from Sweden; CN-HT: hypertension from China; CN-OB: obesity from China.

34

35

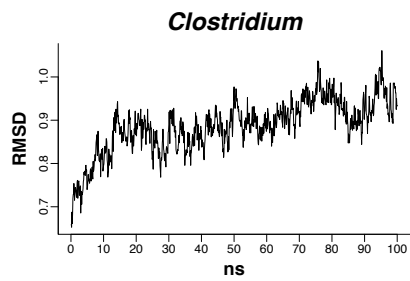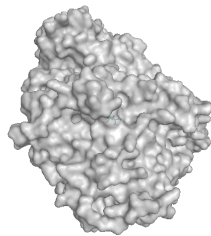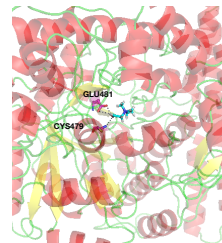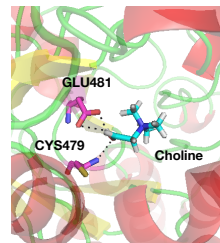

$E(\text{cutC}^{\text{Clostridium}}\text{-choline}) = -4.82 \text{ kcal/mol}$

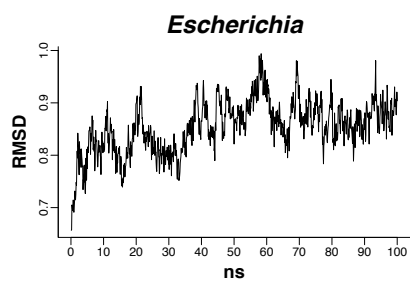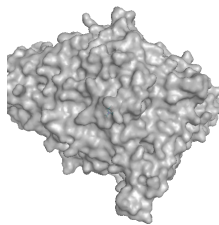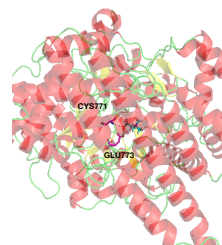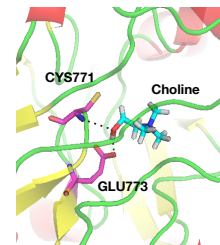

$E(\text{cutC}^{\text{Escherichia}}\text{-choline}) = -4.87 \text{ kcal/mol}$

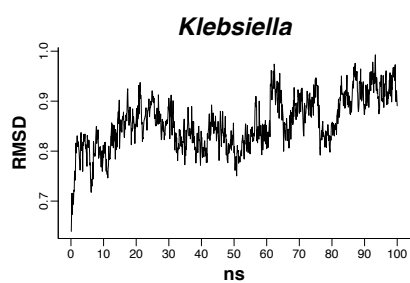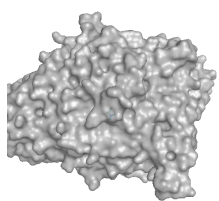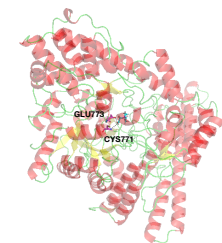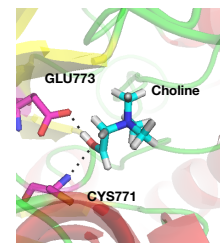

$E(\text{cutC}^{\text{Klebsiella}}\text{-choline}) = -4.88 \text{ kcal/mol}$

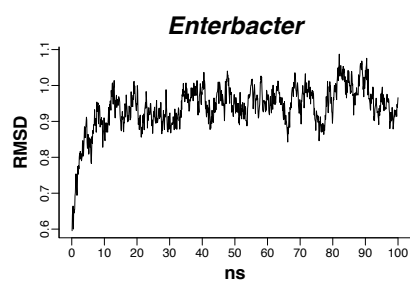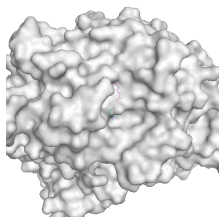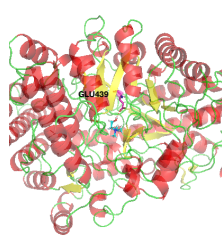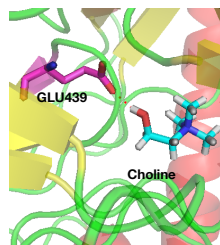

$E(\text{cutC}^{\text{Enterbacter}}\text{-choline}) = -4.34 \text{ kcal/mol}$

36 **Figure 3.** Molecular docking of the other 4 most abundant candidate TMA-producing genera and  
37 choline. The binding pockets are shown in the left panel of the figure, the active binding site on  
38 the macromolecular protein has been marked in bold, and the intermolecular hydrogen bond is  
39 shown by the black dotted line. Amber16 was used to calculate the dynamic changes within 100  
40 ns of the combined compound, and its RMSD is shown in the right column.

41

42

**a.**

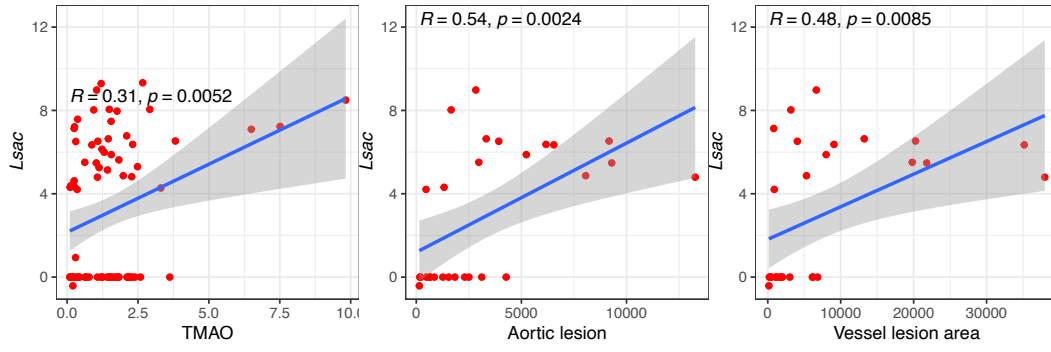

**b.**

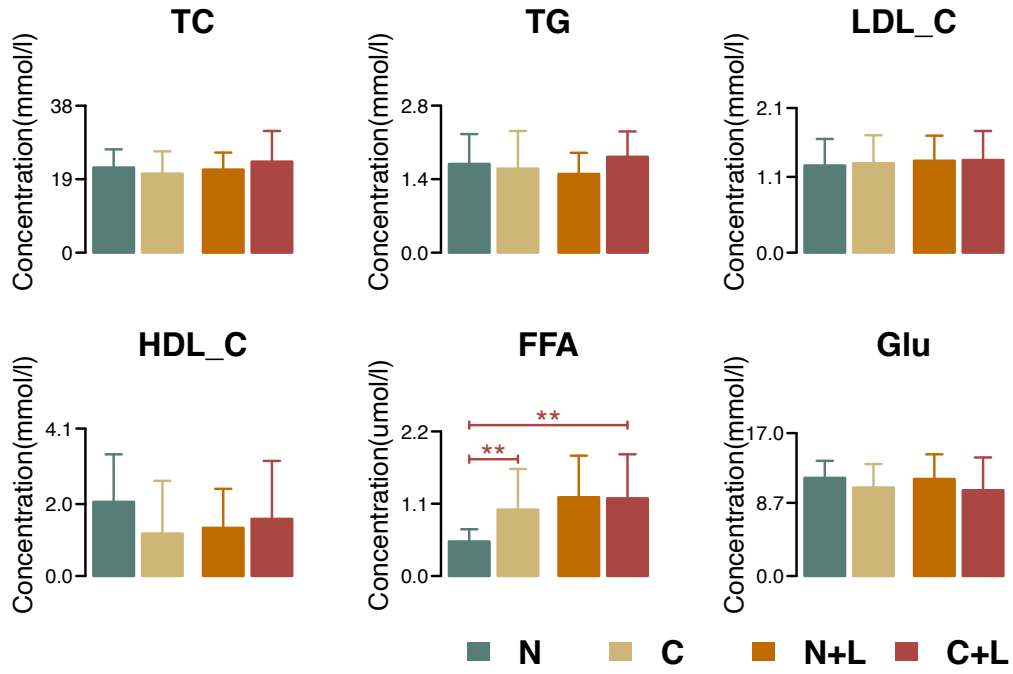



43 **Figure 4.** The effect of *L. saccharolyticum* on atherosclerosis in *ApoE<sup>-/-</sup>* mice. **(a)** Pearson  
44 correlation analysis between the level of *L. saccharolyticum* in feces and TMAO level in serum,  
45 aortic lesion and vessel lesion area. **(b)** Barplots show the concentration of glucose (Glu), non-  
46 esterified free fatty acids (FFA), triglycerides (TG), total cholesterol (TC), low-density lipoprotein  
47 (LDL\_C), and high-density lipoprotein (HDL\_C). Error bars denote the means  $\pm$  SEM. \*  $p < 0.05$ ,  
48 \*\*  $p < 0.01$ , \*\*\*  $p < 0.001$ , the differences among groups were analyzed by single-factor ANOVA  
49 corrected with Tukey HSD test. N: normal group, mice fed with standard chow control diet and  
50 gavaged with the sterile medium; N+L: normal + *L.saccharolyticum* group, mice fed standard  
51 chow and gavaged live *L.saccharolyticum* at a dose of  $5 \times 10^8$  CFUs/100  $\mu$ l; C: choline group,  
52 mice fed with standard chow supplemented with 1.0% choline (Sigma-Aldrich, USA) and gavaged  
53 with the sterile medium; C+L: choline + *L.saccharolyticum* group, mice fed with standard chow  
54 supplemented with 1.0% choline and gavaged with live *L.saccharolyticum* at a dose of  $5 \times 10^8$   
55 CFUs/100  $\mu$ l.

56

Defined Undefined

a.

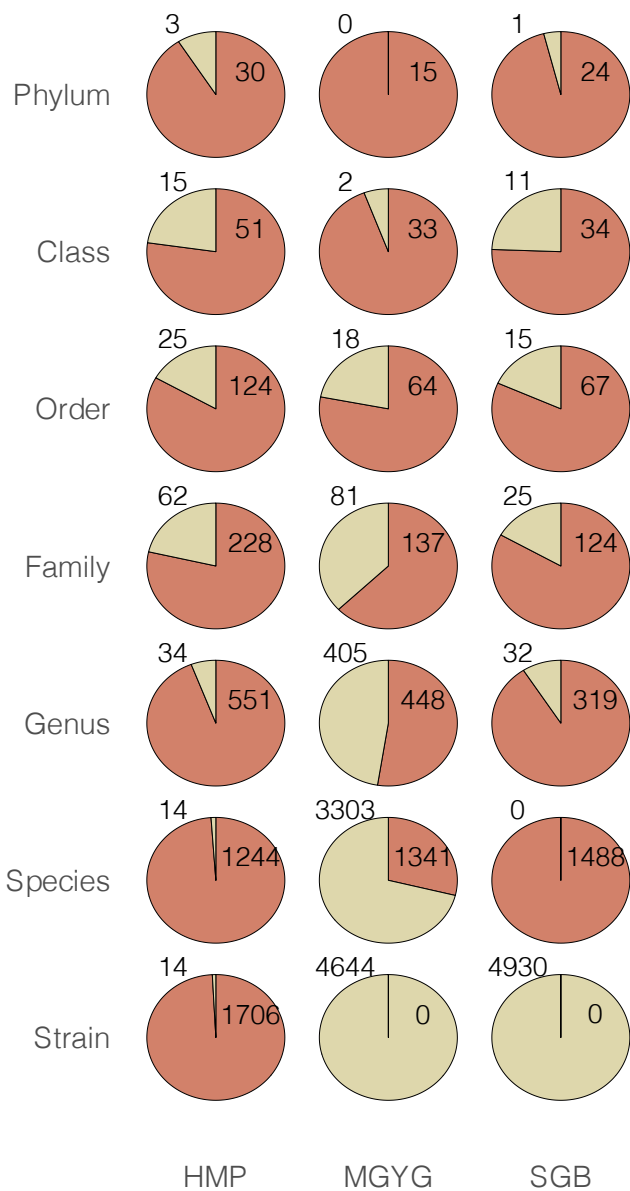

b. Phylum:

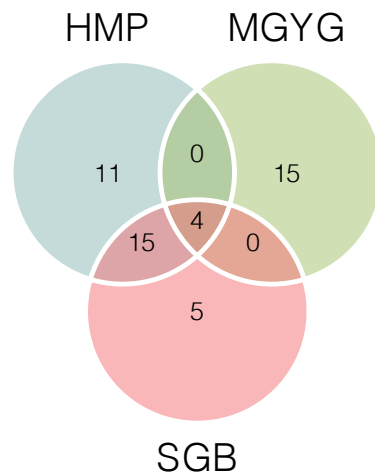

c. Genus:

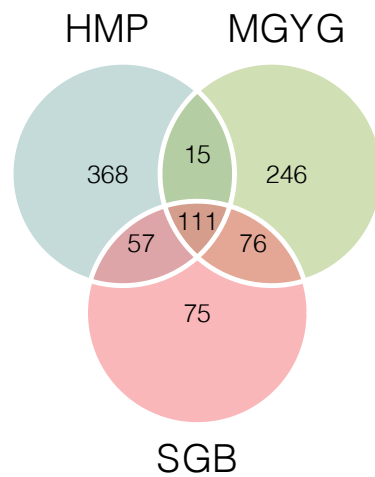

57 **Figure 5.** Taxonomic information of three reference genome resources. **(a)** Pie charts of the  
58 defined and undefined numbers of biological taxonomy. **(b)** Venn diagram analysis of phyla in the  
59 three resources. **(c)** Venn diagram analysis of the genera in the three resources.

60

61

a.

***cutC***

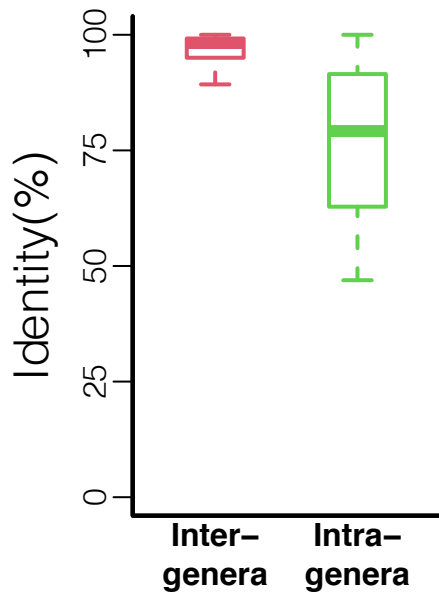

b.

***cutD***

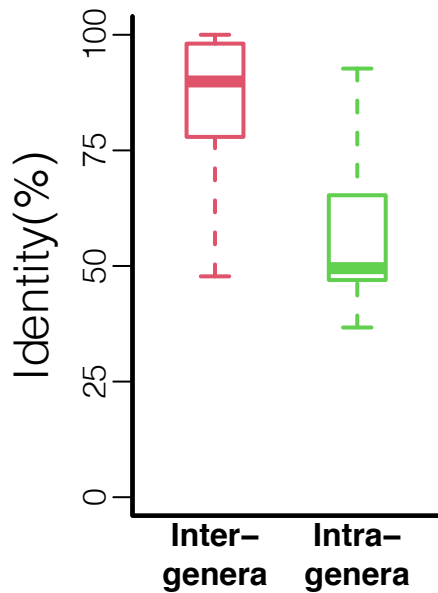

62 **Figure 6.** Inter- and intra-genera sequence identities of *cntA* (**a**) and *cutC* (**b**). The bounds denote  
63 the interquartile range between the first and third quartiles and the center line denotes the median.  
64 The whiskers denote the lowest and highest value.

65









|      |                  |                       |                      |                       |                            |                                                          |      |
|------|------------------|-----------------------|----------------------|-----------------------|----------------------------|----------------------------------------------------------|------|
| HMP  | Proteobacteria   | Gammaproteobacteria   | Enterobacteriales    | Enterobacteriaceae    | Escherichia                | Escherichia coli O157:H7 str. EC4024                     | yeaX |
| HMP  | Proteobacteria   | Gammaproteobacteria   | Enterobacteriales    | Enterobacteriaceae    | Escherichia                | Escherichia albertii TW07627                             | yeaX |
| HMP  | Proteobacteria   | Gammaproteobacteria   | Enterobacteriales    | Enterobacteriaceae    | Escherichia                | Escherichia coli D9                                      | yeaX |
| HMP  | Proteobacteria   | Gammaproteobacteria   | Enterobacteriales    | Enterobacteriaceae    | Escherichia                | Escherichia sp. 4_1_40B                                  | yeaX |
| HMP  | Proteobacteria   | Gammaproteobacteria   | Enterobacteriales    | Enterobacteriaceae    | Yersinia                   | Yersinia pestis Pestoides A                              | yeaX |
| HMP  | Proteobacteria   | Betaproteobacteria    | Burkholderiales      | Alcaligenaceae        | Klebsiella                 | Klebsiella pneumoniae subsp. rhinoscleromatis ATCC 13884 | yeaX |
| HMP  | Proteobacteria   | Gammaproteobacteria   | Enterobacteriales    | Enterobacteriaceae    | Achromobacter              | Achromobacter piechaudii                                 | yeaX |
| HMP  | Proteobacteria   | Gammaproteobacteria   | Enterobacteriales    | Enterobacteriaceae    | Yersinia                   | Yersinia pestis biovar Mediaevalis str. K1973002         | yeaX |
| HMP  | Proteobacteria   | Gammaproteobacteria   | Enterobacteriales    | Enterobacteriaceae    | Escherichia                | Escherichia coli OP50                                    | yeaX |
| HMP  | Proteobacteria   | Gammaproteobacteria   | Enterobacteriales    | Enterobacteriaceae    | Yersinia                   | Yersinia pestis KIM D27                                  | yeaX |
| HMP  | Proteobacteria   | Gammaproteobacteria   | Pseudomonadales      | Moraxellaceae         | Acinetobacter              | Acinetobacter baumannii AB056                            | yeaX |
| HMP  | Proteobacteria   | Gammaproteobacteria   | Pseudomonadales      | Moraxellaceae         | Acinetobacter              | Acinetobacter baumannii AB058                            | yeaX |
| HMP  | Proteobacteria   | Gammaproteobacteria   | Pseudomonadales      | Moraxellaceae         | Acinetobacter              | Acinetobacter baumannii AB059                            | yeaX |
| HMP  | Proteobacteria   | Gammaproteobacteria   | Enterobacteriales    | Enterobacteriaceae    | Escherichia                | Escherichia coli MS 124-1                                | yeaX |
| HMP  | Proteobacteria   | Gammaproteobacteria   | Enterobacteriales    | Enterobacteriaceae    | Escherichia                | Escherichia coli MS 119-1                                | yeaX |
| HMP  | Proteobacteria   | Gammaproteobacteria   | Enterobacteriales    | Enterobacteriaceae    | Escherichia                | Escherichia coli MS 107-1                                | yeaX |
| HMP  | Proteobacteria   | Gammaproteobacteria   | Pseudomonadales      | Moraxellaceae         | Acinetobacter              | Acinetobacter baumannii 6013150                          | yeaX |
| HMP  | Proteobacteria   | Gammaproteobacteria   | Pseudomonadales      | Moraxellaceae         | Acinetobacter              | Acinetobacter baumannii 6013113                          | yeaX |
| HMP  | Proteobacteria   | Gammaproteobacteria   | Pseudomonadales      | Moraxellaceae         | Acinetobacter              | Acinetobacter baumannii 6014059                          | yeaX |
| HMP  | Proteobacteria   | Gammaproteobacteria   | Enterobacteriales    | Enterobacteriaceae    | Providencia                | Providencia rettgeri DSM 1131                            | yeaX |
| HMP  | Proteobacteria   | Gammaproteobacteria   | Enterobacteriales    | Enterobacteriaceae    | Citrobacter                | Citrobacter youngae ATCC 29220                           | yeaX |
| HMP  | Proteobacteria   | Gammaproteobacteria   | Enterobacteriales    | Enterobacteriaceae    | Klebsiella                 | Klebsiella sp. 1_1_55                                    | yeaX |
| HMP  | Proteobacteria   | Gammaproteobacteria   | Enterobacteriales    | Enterobacteriaceae    | Escherichia                | Escherichia coli B088                                    | yeaX |
| HMP  | Proteobacteria   | Gammaproteobacteria   | Enterobacteriales    | Enterobacteriaceae    | Escherichia                | Escherichia coli B185                                    | yeaX |
| HMP  | Proteobacteria   | Gammaproteobacteria   | Enterobacteriales    | Enterobacteriaceae    | Escherichia                | Escherichia coli FVEC1412                                | yeaX |
| HMP  | Proteobacteria   | Gammaproteobacteria   | Enterobacteriales    | Enterobacteriaceae    | Escherichia                | Escherichia coli B354                                    | yeaX |
| HMP  | Proteobacteria   | Gammaproteobacteria   | Pseudomonadales      | Moraxellaceae         | Acinetobacter              | Acinetobacter pittii                                     | yeaX |
| HMP  | Proteobacteria   | Gammaproteobacteria   | Enterobacteriales    | Enterobacteriaceae    | Escherichia                | Escherichia coli MS 198-1                                | yeaX |
| HMP  | Proteobacteria   | Gammaproteobacteria   | Enterobacteriales    | Enterobacteriaceae    | Escherichia                | Escherichia coli MS 84-1                                 | yeaX |
| HMP  | Proteobacteria   | Gammaproteobacteria   | Enterobacteriales    | Enterobacteriaceae    | Escherichia                | Escherichia coli MS 115-1                                | yeaX |
| HMP  | Proteobacteria   | Gammaproteobacteria   | Enterobacteriales    | Enterobacteriaceae    | Escherichia                | Escherichia coli MS 182-1                                | yeaX |
| HMP  | Proteobacteria   | Gammaproteobacteria   | Enterobacteriales    | Enterobacteriaceae    | Escherichia                | Escherichia coli MS 146-1                                | yeaX |
| HMP  | Proteobacteria   | Gammaproteobacteria   | Enterobacteriales    | Enterobacteriaceae    | Escherichia                | Escherichia coli MS 69-1                                 | yeaX |
| HMP  | Proteobacteria   | Gammaproteobacteria   | Enterobacteriales    | Enterobacteriaceae    | Escherichia                | Escherichia coli MS 187-1                                | yeaX |
| HMP  | Proteobacteria   | Gammaproteobacteria   | Enterobacteriales    | Enterobacteriaceae    | Escherichia                | Escherichia coli MS 21-1                                 | yeaX |
| HMP  | Proteobacteria   | Gammaproteobacteria   | Enterobacteriales    | Enterobacteriaceae    | Escherichia                | Escherichia coli MS 78-1                                 | yeaX |
| HMP  | Proteobacteria   | Gammaproteobacteria   | Enterobacteriales    | Enterobacteriaceae    | Escherichia                | Escherichia coli MS 116-1                                | yeaX |
| HMP  | Proteobacteria   | Gammaproteobacteria   | Enterobacteriales    | Enterobacteriaceae    | Escherichia                | Escherichia coli MS 175-1                                | yeaX |
| HMP  | Proteobacteria   | Gammaproteobacteria   | Enterobacteriales    | Enterobacteriaceae    | Escherichia                | Escherichia coli MS 196-1                                | yeaX |
| HMP  | Proteobacteria   | Gammaproteobacteria   | Enterobacteriales    | Enterobacteriaceae    | Escherichia                | Escherichia coli FVEC1302                                | yeaX |
| HMP  | Proteobacteria   | Gammaproteobacteria   | Enterobacteriales    | Enterobacteriaceae    | Escherichia                | Escherichia coli str. K-12 substr. MG1655                | yeaX |
| HMP  | Proteobacteria   | Gammaproteobacteria   | Enterobacteriales    | Enterobacteriaceae    | Xenorhabdus                | Xenorhabdus nematophila ATCC 19061                       | yeaX |
| HMP  | Proteobacteria   | Gammaproteobacteria   | Enterobacteriales    | Enterobacteriaceae    | Yersinia                   | Yersinia pestis Z176003                                  | yeaX |
| HMP  | Proteobacteria   | Betaproteobacteria    | Burkholderiales      | Burkholderiaceae      | Burkholderia               | Burkholderia multivorans ATCC 17616                      | yeaX |
| HMP  | Proteobacteria   | Betaproteobacteria    | Methylotenerales     | Methyloteneraceae     | Methylotenera              | Methylotenera versatilis 301                             | yeaX |
| HMP  | Proteobacteria   | Gammaproteobacteria   | Pseudomonadales      | Moraxellaceae         | Acinetobacter              | Acinetobacter oleivorans DR1                             | yeaX |
| HMP  | Proteobacteria   | Gammaproteobacteria   | Pseudomonadales      | Moraxellaceae         | Acinetobacter              | Acinetobacter baumannii O55:H7 str. CB9615               | yeaX |
| HMP  | Proteobacteria   | Gammaproteobacteria   | Enterobacteriales    | Enterobacteriaceae    | Acinetobacter              | Acinetobacter baumannii SDF                              | yeaX |
| HMP  | Proteobacteria   | Gammaproteobacteria   | Enterobacteriales    | Enterobacteriaceae    | Klebsiella                 | Klebsiella variicola At-22                               | yeaX |
| HMP  | Proteobacteria   | Gammaproteobacteria   | Enterobacteriales    | Enterobacteriaceae    | Escherichia                | Escherichia coli O26:H11 str. 11368                      | yeaX |
| HMP  | Proteobacteria   | Gammaproteobacteria   | Enterobacteriales    | Enterobacteriaceae    | Shigella                   | Shigella flexneri 2002017                                | yeaX |
| HMP  | Proteobacteria   | Gammaproteobacteria   | Enterobacteriales    | Enterobacteriaceae    | Escherichia                | Escherichia coli O42                                     | yeaX |
| HMP  | Proteobacteria   | Gammaproteobacteria   | Pseudomonadales      | Moraxellaceae         | Acinetobacter              | Acinetobacter baumannii ATCC 17978                       | yeaX |
| HMP  | Proteobacteria   | Gammaproteobacteria   | Enterobacteriales    | Enterobacteriaceae    | Shigella                   | Shigella boydii CDC 3083-94                              | yeaX |
| HMP  | Proteobacteria   | Gammaproteobacteria   | Enterobacteriales    | Enterobacteriaceae    | Yersinia                   | Yersinia pseudotuberculosis IP 32953                     | yeaX |
| HMP  | Proteobacteria   | Gammaproteobacteria   | Pseudomonadales      | Pseudomonadaceae      | Pseudomonas                | Pseudomonas putida GB-1                                  | yeaX |
| HMP  | Proteobacteria   | Gammaproteobacteria   | Enterobacteriales    | Enterobacteriaceae    | Shigella                   | Shigella sonnei Ss046                                    | yeaX |
| HMP  | Proteobacteria   | Gammaproteobacteria   | Enterobacteriales    | Enterobacteriaceae    | Yersinia                   | Yersinia pestis biovar Microtus str. 91001               | yeaX |
| HMP  | Firmicutes       | Clostridia            | Clostridiales        | Clostridiaceae        | Clostridium                | Clostridium tetani E88                                   | cutD |
| HMP  | Proteobacteria   | Gammaproteobacteria   | Aleromonadales       | Shewanellaceae        | Shewanella                 | Shewanella oneidensis MR-1                               | cutD |
| HMP  | Firmicutes       | Clostridia            | Halanaerobiales      | Halanaerobiaceae      | Haloferoxhalophilus        | Haloferoxhalophilus oreinii H 168                        | cutD |
| HMP  | Actinobacteria   | Coriobacteria         | Eggerthellales       | Eggerthellaceae       | Eggerthella                | Eggerthella lenta DSM 2243                               | cutD |
| HMP  | Firmicutes       | Clostridia            | Clostridiales        | Peptococcaceae        | Candidatus Desulfohalobium | Candidatus Desulfohalobium audaxvivor MP104C             | cutD |
| HMP  | Proteobacteria   | Deltaproteobacteria   | Desulfuromonadales   | Geobacteraceae        | Geobacter                  | Geobacter uranireducens Rf4                              | cutD |
| HMP  | Proteobacteria   | Deltaproteobacteria   | Desulfuromonadales   | Desulfuromonadaceae   | Pelobacter                 | Pelobacter propionicus DSM 2379                          | cutD |
| HMP  | Dicryogromi      | Dicryogromia          | Dicryogromiales      | Dicryogromiaceae      | Dicryogromus               | Dicryogromus thermophilum H-6-12                         | cutD |
| HMP  | Proteobacteria   | Syntrophobacteriales  | Syntrophobacteriales | Syntrophobacteriaceae | Syntrophobacter            | Syntrophobacter fumaroxidans MPOB                        | cutD |
| HMP  | Proteobacteria   | Deltaproteobacteria   | Desulfuromonadales   | Geobacteraceae        | Geobacter                  | Geobacter metallireducens GS-15                          | cutD |
| HMP  | Proteobacteria   | Deltaproteobacteria   | Desulfuromonadales   | Desulfuromonadaceae   | Pelobacter                 | Pelobacter carbinolicus DSM 2380                         | cutD |
| HMP  | Proteobacteria   | Betaproteobacteria    | Hydrogenophilales    | Hydrogenophilaceae    | Thiobacillus               | Thiobacillus denitrificans ATCC 25259                    | cutD |
| HMP  | Proteobacteria   | Deltaproteobacteria   | Desulfobacteriales   | Desulfobacteriaceae   | Desulfobacterium           | Desulfobacterium autotrophicum HRM2                      | cutD |
| HMP  | Proteobacteria   | Deltaproteobacteria   | Desulfobacteriales   | Desulfobacteriaceae   | Desulfobacterium           | Desulfobacterium autotrophicum HRM2                      | cutD |
| HMP  | Thermotogae      | Thermotogae           | Thermotogales        | Thermotogaceae        | Thermotoga                 | Thermotoga sp. RQ2                                       | cutD |
| HMP  | Firmicutes       | Clostridia            | Clostridiales        | Peptococcaceae        | Desulfotubacterium         | Desulfotubacterium hafniense YS1                         | cutD |
| HMP  | Proteobacteria   | Betaproteobacteria    | Rhodocyclales        | Rhodocyclaceae        | Dechloromonas              | Dechloromonas aromatica RCB                              | cutD |
| HMP  | Bacteroidetes    | Bacteroidia           | Bacteroidales        | Bacteroidaceae        | Bacteroides                | Bacteroides thetaioamicron 1P1-5482                      | cutD |
| HMP  | Firmicutes       | Clostridia            | Clostridiales        | Clostridiaceae        | Clostridium                | Clostridium botulinum A2 str. Kyoto                      | cutD |
| HMP  | Thermotogae      | Thermotogae           | Petrotogales         | NA                    | Marinitoga                 | Marinitoga piezophila KA3                                | cutD |
| HMP  | Bacteroidetes    | Bacteroidia           | Bacteroidales        | Bacteroidaceae        | Bacteroides                | Bacteroides sp. 1_1_6                                    | cutD |
| HMP  | Proteobacteria   | Deltaproteobacteria   | Desulfuromonadales   | Geobacteraceae        | Geobacter                  | Geobacter hemidjensis Bem                                | cutD |
| HMP  | Firmicutes       | Negativicutes         | Selenomonadales      | Sporosporaceae        | Thermosinus                | Thermosinus carboxydivorans Nor-1                        | cutD |
| HMP  | Bacteroidetes    | Bacteroidia           | Bacteroidales        | Bacteroidaceae        | Bacteroides                | Bacteroides ovatus ATCC 8483                             | cutD |
| HMP  | Firmicutes       | Clostridia            | Clostridiales        | NA                    | Pseudoflavonifractor       | Pseudoflavonifractor capillosus ATCC 29799               | cutD |
| HMP  | Bacteroidetes    | Bacteroidia           | Bacteroidales        | Bacteroidaceae        | Bacteroides                | Bacteroides stercoris ATCC 43183                         | cutD |
| HMP  | Proteobacteria   | Betaproteobacteria    | Methylotenerales     | Methyloteneraceae     | Methylovorus               | Methylovorus glucosotrophus SIP3-4                       | cutD |
| HMP  | Proteobacteria   | Aleromonadales        | Shewanellales        | Shewanellaceae        | Shewanella                 | Shewanella benthica KT99                                 | cutD |
| HMP  | Firmicutes       | Clostridia            | Clostridiales        | Clostridiaceae        | Clostridium                | Clostridium sporogenes ATCC 15579                        | cutD |
| HMP  | Proteobacteria   | Alphaproteobacteria   | Rhizobiales          | Rhizobiaceae          | Rhizobium                  | Rhizobium etli Kim 5                                     | cutD |
| HMP  | Proteobacteria   | Alphaproteobacteria   | Rhizobiales          | Rhizobiaceae          | Rhizobium                  | Rhizobium etli CIAT 894                                  | cutD |
| HMP  | Firmicutes       | Clostridia            | Clostridiales        | Peptostreptococcaceae | Peptostreptococcus         | [Clostridium] hiranonis DSM 13275                        | cutD |
| HMP  | Proteobacteria   | Deltaproteobacteria   | Desulfuromonadales   | Geobacteraceae        | Geobacter                  | Geobacter sp. M21                                        | cutD |
| HMP  | Proteobacteria   | Gammaproteobacteria   | Enterobacteriales    | Enterobacteriaceae    | Dickeya                    | Dickeya chrysanthemi Ech1591                             | cutD |
| HMP  | Bacteroidetes    | Bacteroidia           | Bacteroidales        | Bacteroidaceae        | Bacteroides                | Bacteroides coprophilus DSM 18228 = JCM 13818            | cutD |
| HMP  | Bacteroidetes    | Bacteroidia           | Bacteroidales        | Bacteroidaceae        | Bacteroides                | Bacteroides sp. D2                                       | cutD |
| HMP  | Proteobacteria   | Deltaproteobacteria   | Desulfovibrionales   | Desulfovibrionaceae   | Desulfovibrio              | Desulfovibrio magneticus RS-1                            | cutD |
| HMP  | Firmicutes       | Clostridia            | Clostridiales        | Clostridiaceae        | Clostridium                | Clostridium carboxidivorans P7                           | cutD |
| HMP  | Firmicutes       | Clostridia            | Clostridiales        | Clostridiaceae        | Clostridium                | Clostridium carboxidivorans P7                           | cutD |
| HMP  | Firmicutes       | Clostridia            | Clostridiales        | Ruminococcaceae       | Ruminoclostridium          | Ruminoclostridium thermocellum DSM 2360                  | cutD |
| HMP  | Firmicutes       | Clostridia            | Clostridiales        | Ruminococcaceae       | Ruminoclostridium          | [Clostridium] papyrosolvens DSM 2782                     | cutD |
| HMP  | Firmicutes       | Clostridia            | Clostridiales        | Ruminococcaceae       | Ruminoclostridium          | Ruminoclostridium thermocellum JW20                      | cutD |
| HMP  | Proteobacteria   | Gammaproteobacteria   | Vibrionales          | Vibrionaceae          | Vibrio                     | Vibrio alginolyticus 40B                                 | cutD |
| HMP  | Proteobacteria   | Deltaproteobacteria   | Desulfovibrionales   | Desulfovibrionaceae   | Desulfovibrio              | Desulfovibrio aespoensis Aspo-2                          | cutD |
| HMP  | Proteobacteria   | Deltaproteobacteria   | Desulfovibrionales   | Desulfovibrionaceae   | Desulfovibrio              | Desulfovibrio sp. FW1012B                                | cutD |
| HMP  | Bacteroidetes    | Bacteroidia           | Bacteroidales        | Bacteroidaceae        | Bacteroides                | Bacteroides ovatus SD CMC 3f                             | cutD |
| HMP  | Proteobacteria   | Deltaproteobacteria   | Desulfuromonadales   | Geobacteraceae        | Geobacter                  | Geobacter daltonii FRC-32                                | cutD |
| HMP  | Proteobacteria   | Deltaproteobacteria   | Desulfobacteriales   | Desulfobacteriaceae   | Desulfatibacillum          | Desulfatibacillum alkenivorans AK-01                     | cutD |
| HMP  | Firmicutes       | Clostridia            | Clostridiales        | Clostridiaceae        | Clostridium                | Clostridium carboxidivorans P7                           | cutD |
| HMP  | Firmicutes       | Clostridia            | Clostridiales        | Clostridiaceae        | Clostridium                | Clostridium carboxidivorans P7                           | cutD |
| HMP  | Bacteroidetes    | Bacteroidia           | Bacteroidales        | Bacteroidaceae        | Bacteroides                | Bacteroides sp. 1_1_14                                   | cutD |
| HMP  | Bacteroidetes    | Bacteroidia           | Bacteroidales        | Bacteroidaceae        | Bacteroides                | Bacteroides sp. 3_1_23                                   | cutD |
| HMP  | Proteobacteria   | Deltaproteobacteria   | Syntrophobacteriales | Syntrophaceae         | Syntrophus                 | Syntrophus aciditrophicus SB                             | cutD |
| HMP  | Thermotogae      | Thermotogae           | Thermotogales        | Thermotogaceae        | Thermotoga                 | Thermotoga maritima MSB8                                 | cutD |
| HMP  | Proteobacteria   | Deltaproteobacteria   | Desulfuromonadales   | Geobacteraceae        | Geobacter                  | Geobacter sulfurireducens PCA                            | cutD |
| HMP  | Proteobacteria   | Deltaproteobacteria   | Desulfuromonadales   | Geobacteraceae        | Geobacter                  | Geobacter sulfurireducens PCA                            | cutD |
| HMP  | Spirochaetes     | Spirochaetia          | Brachyspirales       | Brachyspiraceae       | Brachyspira                | Brachyspira pilosicoli 95/1000                           | cutD |
| HMP  | Firmicutes       | Clostridia            | Clostridiales        | Clostridiaceae        | Clostridium                | Clostridium ljungdahlii DSM 13528                        | cutD |
| HMP  | Proteobacteria   | Epsilonproteobacteria | Campylobacteriales   | Campylobacteriaceae   | Arcobacter                 | Arcobacter nitrofigilis DSM 7299                         | cutD |
| HMP  | Firmicutes       | Clostridia            | Clostridiales        | Peptococcaceae        | Thermincola                | Thermincola potens JR                                    | cutD |
| HMP  | Bacteroidetes    | Bacteroidia           | Bacteroidales        | Prevotellaceae        | Prevotella                 | Prevotella ruminicola 23                                 | cutD |
| HMP  | Thermotogae      | Thermotogae           | Thermotogales        | Thermotogaceae        | Thermotoga                 | Thermotoga naphthophila RRU-10                           | cutD |
| HMP  | Thermotogae      | Thermotogae           | Thermotogales        | Thermotogaceae        | Thermotoga                 | Thermotoga petrophila RRU-1                              | cutD |
| HMP  | Firmicutes       | Clostridia            | Clostridiales        | Symbiobacteriaceae    | Symbiobacterium            | Symbiobacterium thermophilum IAM 14863                   | cutD |
| HMP  | Proteobacteria   | Deltaproteobacteria   | Myxococcales         | Polysphondyliaceae    | Sorangium                  | Sorangium cellulosum So ce36                             | cutD |
| UHGG | Actinobacteria   | Coriobacteria         | Coriobacteriales     | Atopobiaceae          | Atopobium                  | Atopobium minutum                                        | cutD |
| UHGG | Actinobacteria   | Coriobacteria         | Coriobacteriales     | Coriobacteriaceae     | Collinsella                | Collinsella bonchedarhonensis                            | cutC |
| UHGG | Actinobacteria   | Coriobacteria         | Coriobacteriales     | Coriobacteriaceae     | Collinsella                | Collinsella tanakaei                                     | cutC |
| UHGG | Actinobacteria   | Coriobacteria         | Coriobacteriales     | Coriobacteriaceae     | Collinsella                | Collinsella bouchedarhonensis                            | cutC |
| UHGG | Actinobacteria   | Coriobacteria         | Coriobacteriales     | Coriobacteriaceae     | Collinsella                | Collinsella tanakaei                                     | cutC |
| UHGG | Desulfobacterota | Desulfovibrionia      | Desulfovibrionales   | Desulfovibrionaceae   | Desulfovibrio              | Desulfovibrio desulfuricans                              | cutC |
| UHGG | Desulfobacterota | Desulfovibrionia      | Desulfovibrionales   | Desulfovibrionaceae   | Desulfovibrio              | Desulfovibrio desulfuricans                              | cutC |
| UHGG | Desulfobacterota | Desulfovibrionia      | Desulfovibrionales   | Desulfovibrionaceae   | Desulfovibrio              | Desulfovibrio desulfuricans                              | cutC |
| UHGG | Desulfobacterota | Desulfovibrionia      | Desulfovibrionales   | Desulfovibrionaceae   | Desulfovibrio              | Desulfovibrio desulfuricans                              | cutC |
| UHGG | Desulfobacterota | Desulfovibrionia      | Desulfovibrionales   | Desulfovibrionaceae   | Desulfovibrio              | Desulfovibrio desulfuricans                              | cutC |
| UHGG | Firmicutes       | Bacilli               | Lactobacillales      | Enterococcaceae       | Enterococcus               | Enterococcus asini                                       | cutC |
| UHGG | Firmicutes       | Bacilli               | Lactobacillales      | Enterococcaceae       | Enterococcus               | Enterococcus dispar                                      | cutC |
| UHGG | Firmicutes       | Bacilli               | Lactobacillales      | Enterococcaceae       | Enterococcus               | Enterococcus raffinosus                                  | cutC |
| UHGG | Firmicutes       | Bacilli               | Lactobacillales      | Enterococcaceae       | Enterococcus               | Enterococcus avium                                       | cutC |
| UHGG | Firmicutes       | Bacilli               | Lactobacillales      | Enterococcaceae       | Enterococcus               | Enterococcus cacciae                                     | cutC |
| UHGG | Firmicutes       | Bacilli               | Lactobacillales      | Enterococcaceae       | Enterococcus               | Enterococcus asini                                       | cutC |
| UHGG | Firmicutes       | Bacilli               | Lactobacillales      | Enterococcaceae       | Enterococcus               | Enterococcus dispar                                      | cutC |
| UHGG | Firmicutes       | Bacilli               | Lactobacillales      | Enterococcaceae       | Enterococcus               | Enterococcus raffinosus                                  | cutC |
| UHGG | Firmicutes       | Bacilli               | Lactobacillales      | Enterococcaceae       | Enterococcus               | Enterococcus avium                                       | cutC |
| UHGG | Firmicutes       | Bacilli               | Lactobacillales      | Enterococcaceae       | Enterococcus               | Enterococcus cacciae                                     | cutC |
| UHGG | Firmicutes       | Bacilli               | Lactobacillales      | Enterococcaceae       | Enterococcus               | Enterococcus asini                                       | cutC |
| UHGG | Firmicutes       | Bacilli               | Lactobacillales      | Enterococcaceae       | Enterococcus               | Enterococcus dispar                                      | cutC |
| UHGG | Firmicutes       | Bacilli               | Lactobacillales      | Enterococcaceae       | Enterococcus               | Enterococcus raffinosus                                  | cutC |
| UHGG | Firmicutes       | Bacilli               | Lactobacillales      | Enterococcaceae       | Enterococcus               | Enterococcus avium                                       | cutC |
| UHGG | Firmicutes       | Bacilli               | Lactobacillales      | Enterococcaceae       | Enterococcus               | Enterococcus cacciae                                     | cutC |
| UHGG | Firmicutes       | Bacilli               | Lactobacillales      | Enterococcaceae       | Enterococcus               | Enterococcus asini                                       | cutC |
| UHGG | Firmicutes       | Bacilli               | Lactobacillales      | Enterococcaceae       | Enterococcus               | Enterococcus dispar                                      | cutC |
| UHGG | Firmicutes       | Bacilli               | Lactobacillales      | Enterococcaceae       | Enterococcus               | Enterococcus raffinosus                                  | cutC |
| UHGG | Firmicutes       | Bacilli               | Lactobacillales      | Enterococcaceae       | Enterococcus               | Enterococcus avium                                       | cutC |
| UHGG | Firmicutes       | Bacilli               | Lactobacillales      | Enterococcaceae       | Enterococcus               | Enterococcus cacciae                                     | cutC |
|      |                  |                       |                      |                       |                            |                                                          |      |







|      |                |                     |                     |                              |                            |                                 |                                               |      |
|------|----------------|---------------------|---------------------|------------------------------|----------------------------|---------------------------------|-----------------------------------------------|------|
| UHGG | Proteobacteria | Gammaproteobacteria | Pseudomonadales     | Moraxellaceae                | Acinetobacter              | Acinetobacter pittii            | MGY-GHUT-02346                                | yeaW |
| UHGG | Proteobacteria | Pseudomonadales     | Moraxellaceae       | Moraxellaceae                | Acinetobacter baumannii    | Acinetobacter baumannii         | MGY-GHUT-02344                                | yeaX |
| UHGG | Proteobacteria | Gammaproteobacteria | Pseudomonadales     | Moraxellaceae                | Acinetobacter nosocomialis | Acinetobacter nosocomialis      | MGY-GHUT-02345                                | yeaX |
| UHGG | Proteobacteria | Pseudomonadales     | Moraxellaceae       | Moraxellaceae                | Acinetobacter pittii       | Acinetobacter pittii            | MGY-GHUT-02346                                | yeaX |
| UHGG | Proteobacteria | Gammaproteobacteria | Pseudomonadales     | Pseudomonadaceae             | Pseudomonas                | Pseudomonas citronellolis       | MGY-GHUT-04151                                | cntA |
| UHGG | Proteobacteria | Pseudomonadales     | Pseudomonadales     | Pseudomonadaceae             | Pseudomonas                | Pseudomonas citronellolis       | MGY-GHUT-04151                                | cntB |
| UHGG | Proteobacteria | Gammaproteobacteria | Pseudomonadales     | Pseudomonadaceae             | Pseudomonas                | Pseudomonas citronellolis       | MGY-GHUT-04151                                | cntB |
| UHGG | Proteobacteria | Pseudomonadales     | Pseudomonadales     | Pseudomonadaceae             | Pseudomonas                | Pseudomonas citronellolis       | MGY-GHUT-04151                                | yeaW |
| UHGG | Proteobacteria | Gammaproteobacteria | Pseudomonadales     | Pseudomonadaceae             | Pseudomonas                | Pseudomonas citronellolis       | MGY-GHUT-04151                                | yeaX |
| SGB  | Proteobacteria | Gammaproteobacteria | Enterobacteriales   | Morganellaceae               | Providencia                | Providencia rettgeri            | ZeeviD_2015_PNP_DietIntervention_31_bin.3     | cntA |
| SGB  | Proteobacteria | Gammaproteobacteria | Enterobacteriales   | Morganellaceae               | Providencia                | Providencia rettgeri            | LiJ_2014_VT.UC39-4_bin.41                     | cntA |
| SGB  | Proteobacteria | Gammaproteobacteria | Enterobacteriales   | Enterobacteriaceae           | Escherichia                | Escherichia coli                | CM_madagascar_A82_02_IFE_bin.3                | cntA |
| SGB  | Proteobacteria | Gammaproteobacteria | Enterobacteriales   | Enterobacteriaceae           | Citrobacter                | Citrobacter werkmanii           | VatanenT_2016_G80513_bin.7                    | cntA |
| SGB  | Proteobacteria | Gammaproteobacteria | Enterobacteriales   | Enterobacteriaceae           | Citrobacter                | Citrobacter freundii            | KarlssonFH_2013_S389_bin.5                    | cntA |
| SGB  | Proteobacteria | Gammaproteobacteria | Enterobacteriales   | Enterobacteriaceae           | Citrobacter                | Citrobacter braakii             | GeversD_2014_SKBSTL011_bin.2                  | cntA |
| SGB  | Proteobacteria | Gammaproteobacteria | Enterobacteriales   | Enterobacteriaceae           | Klebsiella                 | Klebsiella quasipneumoniae      | QinJ_2012_DLM028_bin.4                        | cntA |
| SGB  | Proteobacteria | Gammaproteobacteria | Enterobacteriales   | Enterobacteriaceae           | Klebsiella                 | Klebsiella pneumoniae           | NielsenHB_2014_O2_UC38_2_bin.18               | cntA |
| SGB  | Proteobacteria | Gammaproteobacteria | Enterobacteriales   | Enterobacteriaceae           | Klebsiella                 | Klebsiella pneumoniae           | VatanenT_2016_G80555_bin.3                    | cntA |
| SGB  | Proteobacteria | Gammaproteobacteria | Enterobacteriales   | Enterobacteriaceae           | Klebsiella                 | Klebsiella aerogenes            | VogtmannE_2016_MMRS86168210ST-27-0-0_bin.16   | cntA |
| SGB  | Proteobacteria | Gammaproteobacteria | Enterobacteriales   | Enterobacteriaceae           | Serratia                   | Serratia liquefaciens           | VatanenT_2016_G80472_bin.3                    | cntA |
| SGB  | Proteobacteria | Gammaproteobacteria | Pseudomonadales     | Moraxellaceae                | Acinetobacter              | Acinetobacter ursingii          | BackhedF_2015_SID78_M_bin.21                  | cntA |
| SGB  | Proteobacteria | Xanthomonadales     | Xanthomonadales     | Xanthomonadaceae             | Stenotrophomonas           | Stenotrophomonas rhizophila     | OhJ_2014_MET0293_bin.25                       | cntA |
| SGB  | Proteobacteria | Gammaproteobacteria | Pseudomonadales     | Pseudomonadaceae             | Pseudomonas                | Pseudomonas sp. AU11447         | OhJ_2014_MET0293_bin.22                       | cntA |
| SGB  | Proteobacteria | Pseudomonadales     | Pseudomonadales     | Pseudomonadaceae             | Pseudomonas                | Pseudomonas sp. M1              | XieH_2016_YSZC12003_37197R1_bin.69            | cntA |
| SGB  | Proteobacteria | Gammaproteobacteria | Enterobacteriales   | Morganellaceae               | Providencia                | Providencia rettgeri            | ZeeviD_2015_PNP_DietIntervention_31_bin.3     | cntB |
| SGB  | Proteobacteria | Gammaproteobacteria | Enterobacteriales   | Morganellaceae               | Providencia                | Providencia rettgeri            | LiJ_2014_VT.UC39-4_bin.41                     | cntB |
| SGB  | Proteobacteria | Gammaproteobacteria | Enterobacteriales   | Enterobacteriaceae           | Escherichia                | Escherichia albertii            | BackhedF_2015_SID105_12M_bin.10               | cntB |
| SGB  | Proteobacteria | Gammaproteobacteria | Enterobacteriales   | Enterobacteriaceae           | Escherichia                | Escherichia coli                | CM_madagascar_A82_02_IFE_bin.3                | cntB |
| SGB  | Proteobacteria | Gammaproteobacteria | Enterobacteriales   | Enterobacteriaceae           | Citrobacter                | Citrobacter werkmanii           | VatanenT_2016_G80513_bin.7                    | cntB |
| SGB  | Proteobacteria | Gammaproteobacteria | Enterobacteriales   | Enterobacteriaceae           | Citrobacter                | Citrobacter freundii            | KarlssonFH_2013_S389_bin.5                    | cntB |
| SGB  | Proteobacteria | Gammaproteobacteria | Enterobacteriales   | Enterobacteriaceae           | Citrobacter                | Citrobacter braakii             | GeversD_2014_SKBSTL011_bin.2                  | cntB |
| SGB  | Proteobacteria | Gammaproteobacteria | Enterobacteriales   | Enterobacteriaceae           | Klebsiella                 | Klebsiella quasipneumoniae      | QinJ_2012_DLM028_bin.4                        | cntB |
| SGB  | Proteobacteria | Gammaproteobacteria | Enterobacteriales   | Enterobacteriaceae           | Klebsiella                 | Klebsiella pneumoniae           | NielsenHB_2014_O2_UC38_2_bin.18               | cntB |
| SGB  | Proteobacteria | Gammaproteobacteria | Enterobacteriales   | Enterobacteriaceae           | Klebsiella                 | Klebsiella pneumoniae           | VatanenT_2016_G80555_bin.3                    | cntB |
| SGB  | Proteobacteria | Gammaproteobacteria | Enterobacteriales   | Enterobacteriaceae           | Klebsiella                 | Klebsiella aerogenes            | VogtmannE_2016_MMRS86168210ST-27-0-0_bin.16   | cntB |
| SGB  | Proteobacteria | Gammaproteobacteria | Enterobacteriales   | Enterobacteriaceae           | Serratia                   | Serratia liquefaciens           | VatanenT_2016_G80472_bin.3                    | cntB |
| SGB  | Proteobacteria | Pseudomonadales     | Moraxellaceae       | Moraxellaceae                | Acinetobacter              | Acinetobacter baumannii         | WenC_2017_RA130_bin.22                        | cntB |
| SGB  | Proteobacteria | Gammaproteobacteria | Pseudomonadales     | Moraxellaceae                | Acinetobacter              | Acinetobacter ursingii          | BackhedF_2015_SID78_M_bin.21                  | cntB |
| SGB  | Proteobacteria | Xanthomonadales     | Xanthomonadales     | Xanthomonadaceae             | Stenotrophomonas           | Stenotrophomonas rhizophila     | OhJ_2014_MET0293_bin.25                       | cntB |
| SGB  | Proteobacteria | Gammaproteobacteria | Pseudomonadales     | Pseudomonadaceae             | Pseudomonas                | Pseudomonas sp. AU11447         | OhJ_2014_MET0293_bin.22                       | cntB |
| SGB  | Proteobacteria | Pseudomonadales     | Pseudomonadales     | Pseudomonadaceae             | Pseudomonas                | Pseudomonas sp. AU11447         | OhJ_2014_MET0293_bin.22                       | cntB |
| SGB  | Proteobacteria | Gammaproteobacteria | Pseudomonadales     | Pseudomonadaceae             | Pseudomonas                | Pseudomonas sp. T               | OhJ_2014_MET0241_bin.25                       | cntB |
| SGB  | Proteobacteria | Pseudomonadales     | Pseudomonadales     | Pseudomonadaceae             | Pseudomonas                | Pseudomonas sp. M1              | XieH_2016_YSZC12003_37197R1_bin.69            | cntB |
| SGB  | Proteobacteria | Gammaproteobacteria | Pseudomonadales     | Pseudomonadaceae             | Pseudomonas                | Pseudomonas sp. M1              | XieH_2016_YSZC12003_37197R1_bin.69            | cntB |
| SGB  | Proteobacteria | Gammaproteobacteria | Pseudomonadales     | Pseudomonadaceae             | Pseudomonas                | Pseudomonas sp. M1              | YuJ_2015_SZAXP003412-1_bin.19                 | cntB |
| SGB  | Actinobacteria | Coriobacteriia      | Coriobacteriales    | Atopobiaceae                 | Mogibacterium              | Mogibacterium sp. CMS0          | CM_periplantitiss SP_305SPI_T016_bin.15       | cntC |
| SGB  | Firmicutes     | Clostridia          | Clostridiales       | Clostridiales_Family XIII In | Mogibacterium              | Mogibacterium sp. CMS0          | ZeeviD_2015_PNP_Main_62_bin.36                | cntC |
| SGB  | Bacteroidetes  | Bacteroidia         | Bacteroidales       | Bacteroidaceae               | Bacteroides                | Bacteroides vulgatus            | VincentC_2016_MM058.1_bin.7                   | cntC |
| SGB  | Firmicutes     | Clostridia          | Clostridiales       | Peptococcaceae               | Peptococcus                | Peptococcus niger               | FengQ_2015_SID31477_bin.63                    | cntC |
| SGB  | Firmicutes     | Bacilli             | Lactobacillales     | Lactobacillaceae             | Enterococcus               | Enterococcus faecium            | BackhedF_2015_SID184_4M_bin.17                | cntC |
| SGB  | Firmicutes     | Bacilli             | Lactobacillales     | Lactobacillaceae             | Lactobacillus              | Lactobacillus casei             | XieH_2016_YSZC12003_36116_bin.21              | cntC |
| SGB  | Firmicutes     | Clostridia          | Clostridiales       | Clostridiales_unclassified   | Flavonifractor             | Flavonifractor sp. An10         | BackhedF_2015_SID335_M_bin.63                 | cntC |
| SGB  | Firmicutes     | Clostridia          | Clostridiales       | Peptococcaceae               | Peptococcus                | Peptococcus niger               | Bengtsson-PalmeJ_2015_TRAVELRES46_bin.63      | cntC |
| SGB  | Firmicutes     | Clostridia          | Clostridiales       | Lachnospiraceae              | Blautia                    | Blautia obeum                   | HMP_2012_SRS019125_bin.20                     | cntC |
| SGB  | Firmicutes     | Clostridia          | Clostridiales       | Lachnospiraceae              | Johnsonella                | Johnsonella ignava              | HeQ_2017_RSZAXP003069-101_bin.6               | cntC |
| SGB  | Firmicutes     | Clostridia          | Clostridiales       | Lachnospiraceae              | Lachnoclostridium          | Lachnoclostridium asparagiforme | HeQ_2017_RSZAXP003099-133_bin.12              | cntC |
| SGB  | Firmicutes     | Clostridia          | Clostridiales       | Lachnospiraceae              | Lachnoclostridium          | Lachnoclostridium               | GeversD_2014_SKBSTL023_bin.2                  | cntC |
| SGB  | Firmicutes     | Clostridia          | Clostridiales       | Clostridiaceae               | Hungatella                 | Hungatella hathewayi            | NielsenHB_2014_V1_UC14_T_bin.35               | cntC |
| SGB  | Firmicutes     | Clostridia          | Clostridiales       | Clostridiaceae               | Hungatella                 | Hungatella hathewayi            | HeQ_2017_RSZAXP003077-109_bin.16              | cntC |
| SGB  | Firmicutes     | Negativicutes       | Veillonellales      | Veillonellaceae              | Megasphaera                | Megasphaera sp. DJF_B143        | ZellerG_2014_CCISI1362406ST-4-0_bin.75        | cntC |
| SGB  | Firmicutes     | Negativicutes       | Veillonellales      | Veillonellaceae              | Megasphaera                | Megasphaera sp. DJF_B143        | HeQ_2017_SZAXP029575-90_bin.40                | cntC |
| SGB  | Firmicutes     | Negativicutes       | Veillonellales      | Veillonellaceae              | Megasphaera                | Megasphaera sp. DJF_B143        | HeQ_2017_SZAXP029575-90_bin.40                | cntC |
| SGB  | Firmicutes     | Negativicutes       | Veillonellales      | Veillonellaceae              | Megasphaera                | Megasphaera micronuciformis     | BackhedF_2015_SID565_4M_bin.4                 | cntC |
| SGB  | Fusobacteria   | Fusobacteriia       | Fusobacteriales     | Fusobacteriaceae             | Cetobacterium              | Cetobacterium somerae           | YuJ_2015_SZAXP015255-46_bin.49                | cntC |
| SGB  | Fusobacteria   | Fusobacteriia       | Fusobacteriales     | Fusobacteriaceae             | Fusobacterium              | Fusobacterium varium            | QinN_2014_LD-78_bin.12                        | cntC |
| SGB  | Firmicutes     | Clostridia          | Clostridiales       | Clostridiaceae               | Clostridium                | Clostridium disporicum          | FerrettiP_2018_CA_C10020IS2336FE_t1M15_bin.8  | cntC |
| SGB  | Firmicutes     | Clostridia          | Clostridiales       | Clostridiaceae               | Clostridium                | Clostridium paraputrificum      | FerrettiP_2018_CA_C10003IS2040FE_t3M15_bin.2  | cntC |
| SGB  | Firmicutes     | Clostridia          | Clostridiales       | Clostridiaceae               | Clostridium                | Clostridium sporogenes          | BackhedF_2015_SID515_4M_bin.18                | cntC |
| SGB  | Firmicutes     | Clostridia          | Clostridiales       | Clostridiaceae               | Clostridium                | Clostridium sulfdigenes         | HeQ_2017_RSZAXP003063-104_bin.17              | cntC |
| SGB  | Firmicutes     | Clostridia          | Clostridiales       | Peptostreptococcaceae        | Peptoanaerobacter          | Peptoanaerobacter               | HMP_2012_SRS022725_bin.23                     | cntC |
| SGB  | Firmicutes     | Clostridia          | Clostridiales       | Peptostreptococcaceae        | Peptoanaerobacter          | Peptoanaerobacter               | HMP_2012_SRS015215_bin.44                     | cntC |
| SGB  | Firmicutes     | Tissierellales      | Tissierellales      | Peptoniphilaceae             | Anaerococcus               | Anaerococcus hydrogenalis       | VincentC_2016_MM081_bin.7                     | cntC |
| SGB  | Firmicutes     | Tissierellales      | Tissierellales      | Peptoniphilaceae             | Anaerococcus               | Anaerococcus lactolyticus       | VincentC_2016_MM004.2_bin.5                   | cntC |
| SGB  | Firmicutes     | Tissierellales      | Tissierellales      | Peptoniphilaceae             | Anaerococcus               | Anaerococcus tetradicus         | HMP_2012_SRS011111_bin.13                     | cntC |
| SGB  | Firmicutes     | Negativicutes       | Veillonellales      | Veillonellaceae              | Veillonella                | Veillonella seminalis           | YuJ_2015_SZAXP003434-7_bin.67                 | cntC |
| SGB  | Firmicutes     | Bacilli             | Lactobacillales     | Enterococcaceae              | Vagococcus                 | Vagococcus teuberi              | HeQ_2017_SZAXP029501-104_bin.19               | cntC |
| SGB  | Firmicutes     | Bacilli             | Lactobacillales     | Enterococcaceae              | Enterococcus               | Enterococcus raffinosus         | BackhedF_2015_SID1_4M_bin.4                   | cntC |
| SGB  | Firmicutes     | Bacilli             | Lactobacillales     | Enterococcaceae              | Enterococcus               | Enterococcus                    | FerrettiP_2018_CA_C10008IS2131FE_t5M16_bin.7  | cntC |
| SGB  | Firmicutes     | Bacilli             | Lactobacillales     | Enterococcaceae              | Enterococcus               | Enterococcus dispar             | FengQ_2015_SID31870_bin.16                    | cntC |
| SGB  | Proteobacteria | Gammaproteobacteria | Enterobacteriales   | Morganellaceae               | Providencia                | Providencia rettgeri            | HeQ_2017_SZAXP029574-89_bin.4                 | cntC |
| SGB  | Proteobacteria | Gammaproteobacteria | Enterobacteriales   | Morganellaceae               | Providencia                | Providencia rettgeri            | HeQ_2017_SZAXP029545-129_bin.16               | cntC |
| SGB  | Proteobacteria | Gammaproteobacteria | Enterobacteriales   | Morganellaceae               | Providencia                | Providencia rettgeri            | ZeeviD_2015_PNP_DietIntervention_31_bin.3     | cntC |
| SGB  | Proteobacteria | Gammaproteobacteria | Enterobacteriales   | Enterobacteriaceae           | Klebsiella                 | Klebsiella quasipneumoniae      | LiJ_2014_VT.UC39-4_bin.41                     | cntC |
| SGB  | Proteobacteria | Gammaproteobacteria | Enterobacteriales   | Enterobacteriaceae           | Klebsiella                 | Klebsiella pneumoniae           | QinJ_2012_DLM028_bin.4                        | cntC |
| SGB  | Proteobacteria | Gammaproteobacteria | Enterobacteriales   | Enterobacteriaceae           | Klebsiella                 | Klebsiella pneumoniae           | NielsenHB_2014_O2_UC38_2_bin.18               | cntC |
| SGB  | Proteobacteria | Gammaproteobacteria | Enterobacteriales   | Enterobacteriaceae           | Klebsiella                 | Klebsiella aerogenes            | VatanenT_2016_G80555_bin.3                    | cntC |
| SGB  | Proteobacteria | Gammaproteobacteria | Enterobacteriales   | Enterobacteriaceae           | Klebsiella                 | Klebsiella aerogenes            | VogtmannE_2016_MMRS86168210ST-27-0-0_bin.16   | cntC |
| SGB  | Proteobacteria | Gammaproteobacteria | Enterobacteriales   | Enterobacteriaceae           | Klebsiella                 | Klebsiella oxytoca              | FengQ_2015_SID531155_bin.23                   | cntC |
| SGB  | Proteobacteria | Gammaproteobacteria | Enterobacteriales   | Enterobacteriaceae           | Klebsiella                 | Klebsiella michiganensis        | BackhedF_2015_SID608_B_bin.1                  | cntC |
| SGB  | Proteobacteria | Gammaproteobacteria | Enterobacteriales   | Enterobacteriaceae           | Klebsiella                 | Klebsiella sp. Kd70_TUC_EEAO    | FerrettiP_2018_CA_C10035IS2913FE_t4M16_bin.3  | cntC |
| SGB  | Proteobacteria | Gammaproteobacteria | Enterobacteriales   | Enterobacteriaceae           | Raoultella                 | Raoultella ornithinolytica      | FerrettiP_2018_CA_C10029IS2503FE_t3M15_bin.8  | cntC |
| SGB  | Actinobacteria | Coriobacteriia      | Coriobacteriales    | Atopobiaceae                 | Olsenella                  | Olsenella uli                   | CM_periplantitiss SP_143SPI_T016_bin.9        | cntC |
| SGB  | Actinobacteria | Coriobacteriia      | Coriobacteriales    | Atopobiaceae                 | Olsenella                  | Olsenella umbonata              | BritoIL_2016_W2.9.ST_bin.18                   | cntC |
| SGB  | Actinobacteria | Coriobacteriia      | Coriobacteriales    | Atopobiaceae                 | Olsenella                  | Olsenella umbonata              | QinJ_2012_T2D-103_bin.15                      | cntC |
| SGB  | Actinobacteria | Coriobacteriia      | Coriobacteriales    | Coriobacteriaceae            | Collinsella                | Collinsella aerofaciens         | ZellerG_2014_CCIS78100604ST-4-0_bin.15        | cntC |
| SGB  | Firmicutes     | Clostridia          | Clostridiales       | Ruminococcaceae              | Lachnospiraceae            | Lachnospiraceae                 | FengQ_2015_SID31455_bin.4                     | cntC |
| SGB  | Firmicutes     | Clostridia          | Clostridiales       | Ruminococcaceae              | Gemmiger                   | Gemmiger sp. An194              | LiJ_2014_O2.UC48-1_bin.38                     | cntC |
| SGB  | Proteobacteria | Desulfuovibrionales | Desulfuovibrionales | Desulfuovibrionaceae         | Desulfuovibrio             | Desulfuovibrio piger            | ZellerG_2014_CCMDS0071957ST-21-0_bin.42       | cntC |
| SGB  | Proteobacteria | Desulfuovibrionales | Desulfuovibrionales | Desulfuovibrionaceae         | Desulfuovibrio             | Desulfuovibrio piger            | LiJ_2014_MH0398_bin.77                        | cntC |
| SGB  | Proteobacteria | Desulfuovibrionales | Desulfuovibrionales | Desulfuovibrionaceae         | Bilophila                  | Bilophila sp. 4_1_30            | LeChatelierE_2013_MH0239_bin.24               | cntC |
| SGB  | Proteobacteria | Desulfuovibrionales | Desulfuovibrionales | Desulfuovibrionaceae         | Bilophila                  | Bilophila wadsworthia           | FerrettiP_2018_CA_C10024IS2415FE_t3M15_bin.18 | cntC |
| SGB  | Proteobacteria | Desulfuovibrionales | Desulfuovibrionales | Desulfuovibrionaceae         | Bilophila                  | Bilophila wadsworthia           | LiJ_2017_H1M412837_bin.49                     | cntC |
| SGB  | Proteobacteria | Desulfuovibrionales | Desulfuovibrionales | Desulfuovibrionaceae         | Bilophila                  | Bilophila sp. 4_1_30            | HeQ_2017_SZAXP029557-42_bin.30                | cntC |
| SGB  | Proteobacteria | Desulfuovibrionales | Desulfuovibrionales | Desulfuovibrionaceae         | Desulfuovibrio             | Desulfuovibrio piger            | LeChatelierE_2013_MH0108_bin.24               | cntC |
| SGB  | Proteobacteria | Desulfuovibrionales | Desulfuovibrionales | Desulfuovibrionaceae         | Desulfuovibrio             | Desulfuovibrio desulfuricans    | LouisS_2016_AS66_18_bin.13                    | cntC |
| SGB  | Proteobacteria | Desulfuovibrionales | Desulfuovibrionales | Desulfuovibrionaceae         | Desulfuovibrio             | Desulfuovibrio desulfuricans    | XieH_2016_YSZC12003_35387_bin.50              | cntC |
| SGB  | Proteobacteria | Desulfuovibrionales | Desulfuovibrionales | Desulfuovibrionaceae         | Desulfuovibrio             | Desulfuovibrio desulfuricans    | QinN_2014_LD-22_bin.30                        | cntC |
| SGB  | Proteobacteria | Desulfuovibrionales | Desulfuovibrionales | Desulfuovibrionaceae         | Desulfuovibrio             | Desulfuovibrio piger            | RaymondF_2016_PIE0_bin.62                     | cntC |
| SGB  | Proteobacteria | Desulfuovibrionales | Desulfuovibrionales | Desulfuovibrionaceae         | Desulfuovibrio             | Desulfuovibrio legallii         | BackhedF_2015_SID624_M_bin.2                  | cntC |
| SGB  | Firmicutes     | Bacilli             | Lactobacillales     | Enterococcaceae              | Enterococcus               | Enterococcus gallinarum         | VatanenT_2016_G78762_bin.2                    | cntC |
| SGB  | Actinobacteria | Coriobacteriia      | Coriobacteriales    | Atopobiaceae                 | Atopobium                  | Atopobium minutum               | YuJ_2015_SZAXP003412-1_bin.19                 | cntC |
| SGB  | Bacteroidetes  | Bacteroidia         | Bacteroidales       | Bacteroidaceae               | Bacteroides                | Bacteroides xylanisolvens       | HMP_2012_SRS042628_bin.29                     | cntC |
| SGB  | Firmicutes     | Clostridia          | Clostridiales       | Clostridiales_Family XIII In | Mogibacterium              | Mogibacterium sp. CMS0          | CM_periplantitiss SP_305SPI_T016_bin.15       | cntC |
| SGB  | Bacteroidetes  | Bacteroidia         | Bacteroidales       | Bacteroidaceae               | Bacteroides                | Bacteroides vulgatus            | ZeeviD_2015_PNP_Main_62_bin.36                | cntC |
| SGB  | Firmicutes     | Clostridia          | Clostridiales       | Peptococcaceae               | Peptococcus                | Peptococcus niger               | VincentC_2016_MM058.1_bin.7                   | cntC |
| SGB  | Firmicutes     | Bacilli             | Lactobacillales     | Enterococcaceae              | Enterococcus               | Enterococcus faecium            | FengQ_2015_SID31477_bin.63                    | cntC |
| SGB  | Firmicutes     | Bacilli             | Lactobacillales     | Lactobacillaceae             | Lactobacillus              | Lactobacillus casei             | BackhedF_2015_SID184_4M_bin.17                | cntC |
| SGB  | Firmicutes     | Clostridia          | Clostridiales       | Clostridiales_unclassified   | Flavonifractor             | Flavonifractor sp. An10         | XieH_2016_YSZC12003_36116_bin.21              | cntC |
| SGB  | Firmicutes     | Clostridia          | Clostridiales       | Peptococcaceae               | Peptococcus                | Peptococcus niger               | BackhedF_2015_SID335_M_bin.63                 | cntC |
| SGB  | Firmicutes     | Clostridia          | Clostridiales       | Lachnospiraceae              | Blautia                    | Blautia obeum                   | Bengtsson-PalmeJ_2015_TRAVELRES46_bin.63      | cntC |
| SGB  | Firmicutes     | Clostridia          | Clostridiales       | Lachnospiraceae              | Johnsonella                | Johnsonella ignava              | CM_madagascar_A82_02_IFE_bin.3                | cntC |
| SGB  | Firmicutes     | Clostridia          | Clostrid            |                              |                            |                                 |                                               |      |

|     |                |                     |                    |                     |                       |                                |                                               |      |
|-----|----------------|---------------------|--------------------|---------------------|-----------------------|--------------------------------|-----------------------------------------------|------|
| SGB | Proteobacteria | Gammaproteobacteria | Enterobacteriales  | Enterobacteriaceae  | Klebsiella            | Klebsiella_sp_Kd70_TUC_EEAO    | FerrettiP_2018_CA_C10035IS2913FE_t4M16_bin.3  | cutD |
| SGB | Proteobacteria | Gammaproteobacteria | Enterobacteriales  | Enterobacteriaceae  | Raouliella            | Raouliella_ornitholytica       | FerrettiP_2018_CA_C10029IS2503FE_t3M15_bin.8  | cutD |
| SGB | Firmicutes     | Clostridia          | Clostridiales      | Clostridiaceae      | Clostridium           | Clostridium_sp_ATCC_29733      | XieH_2016_YSZC12003_36055_bin.93              | cutD |
| SGB | Firmicutes     | Clostridia          | Clostridiales      | Lachnospiraceae     | Blautia               | Ruminococcus_sp                | XieH_2016_YSZC12003_37394_bin.53              | cutD |
| SGB | Firmicutes     | Clostridia          | Clostridiales      | Ruminococcaceae     | Ruminiclostridium     | Eubacterium_siraeum            | Obregon-TitoAJ_2015_SM20_bin.35               | cutD |
| SGB | Actinobacteria | Coriobacteriia      | Coriobacteriales   | Atopobiaceae        | Olsenella             | Olsenella_uli                  | CM_periplantitis_SP_143SPI_T016_bin.9         | cutD |
| SGB | Actinobacteria | Coriobacteriia      | Coriobacteriales   | Atopobiaceae        | Olsenella             | Olsenella_umbonata             | BritoIL_2016_W2.9.ST_bin.18                   | cutD |
| SGB | Actinobacteria | Coriobacteriia      | Coriobacteriales   | Atopobiaceae        | Olsenella             | Olsenella_umbonata             | QinJ_2012_T2D-103_bin.15                      | cutD |
| SGB | Actinobacteria | Coriobacteriia      | Coriobacteriales   | Coriobacteriaceae   | Collinsella           | Collinsella_aerofaciens        | ZellerG_2014_CCIS78100604ST-4-0_bin.15        | cutD |
| SGB | Firmicutes     | Clostridia          | Clostridiales      | Ruminococcaceae     | Ruminiclostridium     | Clostridium_leptum             | FengQ_2015_SID31455_bin.4                     | cutD |
| SGB | Firmicutes     | Clostridia          | Clostridiales      | Ruminococcaceae     | Anaeromassilibacillus | Anaeromassilibacillus_sp_An250 | LoombaK_2017_SID1050_bax_bin.11               | cutD |
| SGB | Firmicutes     | Clostridia          | Clostridiales      | Ruminococcaceae     | Anaeromassilibacillus | Anaeromassilibacillus_sp_An250 | LiJ_2014_MH0370_bin.9                         | cutD |
| SGB | Firmicutes     | Clostridia          | Clostridiales      | Ruminococcaceae     | Faecalibacterium      | Faecalibacterium_prausnitzii   | LiJ_2014_V1.UC58-4_bin.44                     | cutD |
| SGB | Firmicutes     | Clostridia          | Clostridiales      | Ruminococcaceae     | Gemmiger              | Gemmiger_sp_An194              | LiJ_2014_O2.UC48-1_bin.38                     | cutD |
| SGB | Proteobacteria | Dellaproteobacteria | Desulfovibrionales | Desulfovibrionaceae | Desulfovibrio         | Desulfovibrio_piger            | ZellerG_2014_CCMD50071937ST-21-0_bin.42       | cutD |
| SGB | Proteobacteria | Dellaproteobacteria | Desulfovibrionales | Desulfovibrionaceae | Desulfovibrio         | Desulfovibrio_piger            | LiJ_2014_MH0398_bin.77                        | cutD |
| SGB | Proteobacteria | Dellaproteobacteria | Desulfovibrionales | Desulfovibrionaceae | Bilophila             | Bilophila_sp_4_1_30            | LeChateLierE_2013_MH0239_bin.24               | cutD |
| SGB | Proteobacteria | Dellaproteobacteria | Desulfovibrionales | Desulfovibrionaceae | Bilophila             | Bilophila_wadsworthia          | FerrettiP_2018_CA_C10024IS2415FE_t3M15_bin.18 | cutD |
| SGB | Proteobacteria | Dellaproteobacteria | Desulfovibrionales | Desulfovibrionaceae | Bilophila             | Bilophila_wadsworthia          | LiJ_2017_H1M412837_bin.49                     | cutD |
| SGB | Proteobacteria | Dellaproteobacteria | Desulfovibrionales | Desulfovibrionaceae | Desulfovibrio         | Desulfovibrio                  | HeQ_2017_SZLXP029537-42_bin.30                | cutD |
| SGB | Proteobacteria | Dellaproteobacteria | Desulfovibrionales | Desulfovibrionaceae | Desulfovibrio         | Desulfovibrio_piger            | ChengpingW_2017_AS9raw_bin.35                 | cutD |
| SGB | Proteobacteria | Dellaproteobacteria | Desulfovibrionales | Desulfovibrionaceae | Desulfovibrio         | Desulfovibrio_piger            | LeChateLierE_2013_MH0108_bin.24               | cutD |
| SGB | Proteobacteria | Dellaproteobacteria | Desulfovibrionales | Desulfovibrionaceae | Desulfovibrio         | Desulfovibrio_desulfuricans    | LouisS_2016_AS66_18_bin.13                    | cutD |
| SGB | Proteobacteria | Dellaproteobacteria | Desulfovibrionales | Desulfovibrionaceae | Desulfovibrio         | Desulfovibrio_desulfuricans    | XieH_2016_YSZC12003_35387_bin.50              | cutD |
| SGB | Proteobacteria | Dellaproteobacteria | Desulfovibrionales | Desulfovibrionaceae | Desulfovibrio         | Desulfovibrio_desulfuricans    | QinN_2014_LD-22_bin.30                        | cutD |
| SGB | Proteobacteria | Dellaproteobacteria | Desulfovibrionales | Desulfovibrionaceae | Desulfovibrio         | Desulfovibrio_piger            | RaymondF_2016_P1E0_bin.62                     | cutD |
| SGB | Proteobacteria | Dellaproteobacteria | Desulfovibrionales | Desulfovibrionaceae | Desulfovibrio         | Desulfovibrio_legallii         | BackhedF_2015_SID624_M_bin.2                  | cutD |
| SGB | Proteobacteria | Gammaproteobacteria | Enterobacteriales  | Morganellaceae      | Providencia           | Providencia_retgeri            | ZeeviD_2015_PNP_DietIntervention_31_bin.3     | yeaW |
| SGB | Proteobacteria | Gammaproteobacteria | Enterobacteriales  | Morganellaceae      | Providencia           | Providencia_retgeri            | LiJ_2014_V1.UC39-4_bin.41                     | yeaW |
| SGB | Proteobacteria | Gammaproteobacteria | Enterobacteriales  | Enterobacteriaceae  | Escherichia           | Escherichia_coli               | CM_madagascar_A82_02_1FE_bin.3                | yeaW |
| SGB | Proteobacteria | Gammaproteobacteria | Enterobacteriales  | Enterobacteriaceae  | Citrobacter           | Citrobacter_werkmanii          | VatanenT_2016_G80513_bin.7                    | yeaW |
| SGB | Proteobacteria | Gammaproteobacteria | Enterobacteriales  | Enterobacteriaceae  | Citrobacter           | Citrobacter_freundii           | KarlssonFH_2013_S389_bin.5                    | yeaW |
| SGB | Proteobacteria | Gammaproteobacteria | Enterobacteriales  | Enterobacteriaceae  | Citrobacter           | Citrobacter_braakii            | GeversD_2014_SKBSTL011_bin.2                  | yeaW |
| SGB | Proteobacteria | Gammaproteobacteria | Enterobacteriales  | Enterobacteriaceae  | Klebsiella            | Klebsiella_quasipneumoniae     | QinJ_2012_DLM028_bin.4                        | yeaW |
| SGB | Proteobacteria | Gammaproteobacteria | Enterobacteriales  | Enterobacteriaceae  | Klebsiella            | Klebsiella_pneumoniae          | NielsenHB_2014_O2_UC38_2_bin.18               | yeaW |
| SGB | Proteobacteria | Gammaproteobacteria | Enterobacteriales  | Enterobacteriaceae  | Klebsiella            | Klebsiella_pneumoniae          | VatanenT_2016_G80588_bin.5                    | yeaW |
| SGB | Proteobacteria | Gammaproteobacteria | Enterobacteriales  | Enterobacteriaceae  | Klebsiella            | Klebsiella_aerogenes           | VatanenT_2016_G80555_bin.3                    | yeaW |
| SGB | Proteobacteria | Gammaproteobacteria | Enterobacteriales  | Enterobacteriaceae  | Klebsiella            | Klebsiella_aerogenes           | VogtmannE_2016_MMRS86168210ST-27-0-0_bin.16   | yeaW |
| SGB | Proteobacteria | Gammaproteobacteria | Enterobacteriales  | Yersiniaceae        | Serratia              | Serratia_liquefaciens          | VatanenT_2016_G80472_bin.3                    | yeaW |
| SGB | Proteobacteria | Gammaproteobacteria | Pseudomonadales    | Moraxellaceae       | Acinetobacter         | Acinetobacter_ursingii         | BackhedF_2015_SID78_M_bin.21                  | yeaW |
| SGB | Proteobacteria | Xanthomonadales     | Xanthomonadales    | Xanthomonadaceae    | Stenotrophomonas      | Stenotrophomonas_rhizophila    | OhJ_2014_MET0293_bin.25                       | yeaW |
| SGB | Proteobacteria | Gammaproteobacteria | Pseudomonadales    | Pseudomonadaceae    | Pseudomonas           | Pseudomonas_sp_AU11447         | OhJ_2014_MET0293_bin.22                       | yeaW |
| SGB | Proteobacteria | Gammaproteobacteria | Pseudomonadales    | Pseudomonadaceae    | Pseudomonas           | Pseudomonas_sp_M1              | XieH_2016_YSZC12003_37197R1_bin.69            | yeaW |
| SGB | Proteobacteria | Gammaproteobacteria | Enterobacteriales  | Morganellaceae      | Providencia           | Providencia_retgeri            | ZeeviD_2015_PNP_DietIntervention_31_bin.3     | yeaX |
| SGB | Proteobacteria | Gammaproteobacteria | Enterobacteriales  | Morganellaceae      | Providencia           | Providencia_retgeri            | LiJ_2014_V1.UC39-4_bin.41                     | yeaX |
| SGB | Proteobacteria | Gammaproteobacteria | Enterobacteriales  | Enterobacteriaceae  | Escherichia           | Escherichia_albertii           | BackhedF_2015_SID105_12M_bin.10               | yeaX |
| SGB | Proteobacteria | Gammaproteobacteria | Enterobacteriales  | Enterobacteriaceae  | Escherichia           | Escherichia_coli               | CM_madagascar_A82_02_1FE_bin.3                | yeaX |
| SGB | Proteobacteria | Gammaproteobacteria | Enterobacteriales  | Enterobacteriaceae  | Citrobacter           | Citrobacter_werkmanii          | VatanenT_2016_G80513_bin.7                    | yeaX |
| SGB | Proteobacteria | Gammaproteobacteria | Enterobacteriales  | Enterobacteriaceae  | Citrobacter           | Citrobacter_freundii           | KarlssonFH_2013_S389_bin.5                    | yeaX |
| SGB | Proteobacteria | Gammaproteobacteria | Enterobacteriales  | Enterobacteriaceae  | Citrobacter           | Citrobacter_braakii            | GeversD_2014_SKBSTL011_bin.2                  | yeaX |
| SGB | Proteobacteria | Gammaproteobacteria | Enterobacteriales  | Enterobacteriaceae  | Klebsiella            | Klebsiella_quasipneumoniae     | QinJ_2012_DLM028_bin.4                        | yeaX |
| SGB | Proteobacteria | Gammaproteobacteria | Enterobacteriales  | Enterobacteriaceae  | Klebsiella            | Klebsiella_pneumoniae          | NielsenHB_2014_O2_UC38_2_bin.18               | yeaX |
| SGB | Proteobacteria | Gammaproteobacteria | Enterobacteriales  | Enterobacteriaceae  | Klebsiella            | Klebsiella_pneumoniae          | VatanenT_2016_G80588_bin.5                    | yeaX |
| SGB | Proteobacteria | Gammaproteobacteria | Enterobacteriales  | Enterobacteriaceae  | Klebsiella            | Klebsiella_aerogenes           | VatanenT_2016_G80555_bin.3                    | yeaX |
| SGB | Proteobacteria | Gammaproteobacteria | Enterobacteriales  | Enterobacteriaceae  | Klebsiella            | Klebsiella_aerogenes           | VogtmannE_2016_MMRS86168210ST-27-0-0_bin.16   | yeaX |
| SGB | Proteobacteria | Gammaproteobacteria | Enterobacteriales  | Enterobacteriaceae  | Serratia              | Serratia_liquefaciens          | VatanenT_2016_G80472_bin.3                    | yeaX |
| SGB | Proteobacteria | Gammaproteobacteria | Pseudomonadales    | Moraxellaceae       | Acinetobacter         | Acinetobacter_baumannii        | WenC_2017_RA130_bin.22                        | yeaX |
| SGB | Proteobacteria | Gammaproteobacteria | Pseudomonadales    | Moraxellaceae       | Acinetobacter         | Acinetobacter_ursingii         | BackhedF_2015_SID78_M_bin.21                  | yeaX |
| SGB | Proteobacteria | Xanthomonadales     | Xanthomonadales    | Xanthomonadaceae    | Stenotrophomonas      | Stenotrophomonas_rhizophila    | OhJ_2014_MET0293_bin.25                       | yeaX |
| SGB | Proteobacteria | Gammaproteobacteria | Pseudomonadales    | Pseudomonadaceae    | Pseudomonas           | Pseudomonas_sp_AU11447         | OhJ_2014_MET0293_bin.22                       | yeaX |
| SGB | Proteobacteria | Gammaproteobacteria | Pseudomonadales    | Pseudomonadaceae    | Pseudomonas           | Pseudomonas_sp_M1              | XieH_2016_YSZC12003_37197R1_bin.69            | yeaX |
| SGB | Proteobacteria | Gammaproteobacteria | Pseudomonadales    | Pseudomonadaceae    | Pseudomonas           | Pseudomonas_oleovorans         | OhJ_2014_MET0054_bin.5                        | yeaX |



**Supplementary Table 2. Taxonomic information of TMA-lyase from Human Microbiome Project database, 4,644 gut prokaryotes (MGYG, Almeida et al. 2020 - PMID 32690973) and recapitulated 4,930 species-level genome bins (SGBs, Pasolli et al. 2019 - PMID 30661755).**

| Phylum             | Genus            | Species                                    | Database     | cntA | cntB | cutC | cutD | yeaW | yeaX |
|--------------------|------------------|--------------------------------------------|--------------|------|------|------|------|------|------|
| Actinobacteria     | <i>Atopobium</i> | <i>Atopobium minutum</i>                   | UHGG/SGB     |      |      | +    | +    |      |      |
|                    |                  | <i>Collinsella bouchesdurhonensis</i>      | UHGG         |      |      | +    | +    |      |      |
|                    |                  | <i>Collinsella tanakaei</i>                | UHGG         |      |      | +    | +    |      |      |
|                    |                  | <i>Collinsella aerofaciens</i>             | SGB          |      |      | +    | +    |      |      |
|                    |                  | <i>Eggerthella lenta</i>                   | HMP          |      |      |      |      | +    | +    |
|                    |                  | <i>Olsenella uli</i>                       | HMP/SGB      |      |      |      |      | +    | +    |
|                    |                  | <i>Olsenella umbonata</i>                  | SGB          |      |      | +    | +    |      |      |
|                    |                  | <i>Bacteroides coprophilus</i>             | HMP          |      |      |      |      | +    | +    |
|                    |                  | <i>Bacteroides ovatus</i>                  | HMP          |      |      |      |      | +    | +    |
|                    |                  | <i>Bacteroides sp. 1_1_14</i>              | HMP          |      |      |      |      | +    | +    |
| Bacteroidetes      |                  | <i>Bacteroides sp. 1_1_6</i>               | HMP          |      |      |      |      | +    | +    |
|                    |                  | <i>Bacteroides sp. 3_1_23</i>              | HMP          |      |      |      |      | +    | +    |
|                    |                  | <i>Bacteroides sp. D2</i>                  | HMP          |      |      |      |      | +    | +    |
|                    |                  | <i>Bacteroides stercoris</i>               | HMP          |      |      |      |      | +    | +    |
|                    |                  | <i>Bacteroides thetaiotaomicron</i>        | HMP          |      |      |      |      | +    | +    |
|                    |                  | <i>Bacteroides vulgatus</i>                | SGB          |      |      | +    | +    |      |      |
|                    |                  | <i>Bacteroides xylanisolvens</i>           | SGB          |      |      |      |      | +    | +    |
|                    |                  | <i>Prevotella ruminicola</i>               | HMP          |      |      |      |      | +    | +    |
|                    |                  | <i>Desulfovibrio desulfuricans</i>         | UHGG         |      |      | +    | +    |      |      |
|                    |                  | <i>Dictyoglomus thermophilum</i>           | HMP          |      |      |      |      | +    | +    |
| Desulfobacterota_A |                  | <i>Alkaliphilus metalliredigens</i>        | HMP          |      |      | +    | +    |      |      |
|                    |                  | <i>Alkaliphilus oremlandii</i>             | HMP          |      |      | +    | +    |      |      |
|                    |                  | <i>Anaerococcus hydrogenalis</i>           | HMP/UHGG/SGB |      |      | +    | +    |      |      |
|                    |                  | <i>Anaerococcus obesiensis</i>             | UHGG         |      |      | +    | +    |      |      |
|                    |                  | <i>Anaerococcus tetradius</i>              | HMP/SGB      |      |      | +    | +    |      |      |
|                    |                  | <i>Anaerococcus vaginalis</i>              | HMP/UHGG     |      |      | +    | +    |      |      |
|                    |                  | <i>Anaerococcus lactolyticus</i>           | SGB          |      |      | +    | +    |      |      |
|                    |                  | <i>Anaerococcus sp. HMSC065G05</i>         | SGB          |      |      | +    | +    |      |      |
|                    |                  | <i>Anaeroglobus massiliensis</i>           | UHGG         |      |      | +    | +    |      |      |
|                    |                  | <i>Anaeromassilibacillus sp001305115</i>   | UHGG         |      |      |      |      | +    | +    |
| Dictyoglomi        |                  | <i>Anaeromassilibacillus sp002159845</i>   | UHGG         |      |      |      |      | +    | +    |
|                    |                  | <i>Anaeromassilibacillus sp_An250</i>      | SGB          |      |      |      |      | +    | +    |
|                    |                  | <i>Anaerosalibacter_A massiliensis</i>     | UHGG         |      |      | +    | +    |      |      |
|                    |                  | <i>Blautia obeum</i>                       | SGB          |      |      | +    | +    |      |      |
|                    |                  | <i>Ruminococcus sp</i>                     | SGB          |      |      |      |      | +    | +    |
|                    |                  | <i>Caecibacter massiliensis</i>            | UHGG         |      |      | +    | +    |      |      |
|                    |                  | <i>Candidatus Desulforudis audaxviator</i> | HMP          |      |      |      |      | +    | +    |
|                    |                  | <i>Christensenella_A timonensis</i>        | UHGG         |      |      |      |      | +    | +    |
|                    |                  | <i>Clostridium baratii</i>                 | UHGG         |      |      | +    | +    |      |      |
|                    |                  | <i>Clostridium botulinum</i>               | HMP/UHGG     |      |      | +    | +    |      |      |
| Firmicutes         |                  | <i>Clostridium carboxidivorans</i>         | HMP          |      |      | +    | +    |      |      |
|                    |                  | <i>Clostridium citroniae</i>               | UHGG         |      |      | +    | +    |      |      |
|                    |                  | <i>Clostridium clostridioforme</i>         | UHGG         |      |      | +    | +    |      |      |
|                    |                  | <i>Clostridium ihumii</i>                  | UHGG         |      |      | +    | +    |      |      |
|                    |                  | <i>Clostridium ljungdahlii</i>             | HMP          |      |      | +    | +    |      |      |
|                    |                  | <i>Clostridium paraputrificum</i>          | UHGG/SGB     |      |      | +    | +    |      |      |
|                    |                  | <i>Clostridium senegalense</i>             | UHGG         |      |      | +    | +    |      |      |
|                    |                  | <i>Clostridium septicum</i>                | UHGG         |      |      | +    | +    |      |      |
|                    |                  | <i>Clostridium sporogenes</i>              | HMP/SGB      |      |      | +    | +    |      |      |
|                    |                  | <i>Clostridium tepidum</i>                 | UHGG         |      |      | +    | +    |      |      |
| Firmicutes         |                  | <i>Clostridium tetani</i>                  | HMP/UHGG     |      |      | +    | +    |      |      |
|                    |                  | <i>Clostridium disporicum</i>              | SGB          |      |      | +    | +    |      |      |
|                    |                  | <i>Clostridium sp. ATCC_29733</i>          | SGB          |      |      |      |      | +    | +    |
|                    |                  | <i>Clostridium sulfidigenes</i>            | SGB          |      |      | +    | +    |      |      |
|                    |                  | <i>Desulfitobacterium hafniense</i>        | HMP/UHGG     |      |      | +    | +    |      |      |
|                    |                  | <i>Desulfotomaculum reducens</i>           | HMP          |      |      | +    | +    |      |      |
|                    |                  | <i>Enterococcus asini</i>                  | UHGG         |      |      | +    | +    |      |      |
|                    |                  | <i>Enterococcus avium</i>                  | UHGG         |      |      | +    | +    |      |      |
|                    |                  | <i>Enterococcus caccae</i>                 | UHGG         |      |      | +    | +    |      |      |
|                    |                  | <i>Enterococcus dispar</i>                 | UHGG/SGB     |      |      | +    | +    |      |      |
| Firmicutes         |                  | <i>Enterococcus raffinosus</i>             | UHGG/SGB     |      |      | +    | +    |      |      |
|                    |                  | <i>Enterococcus faecium</i>                | SGB          |      |      | +    | +    |      |      |
|                    |                  | <i>Enterococcus gallinarum</i>             | SGB          |      |      |      |      | +    | +    |
|                    |                  | <i>Enterococcus sp. HMSC05C03</i>          | SGB          |      |      | +    | +    |      |      |
|                    |                  | <i>Faecalibacterium prausnitzii</i>        | SGB          |      |      |      |      | +    | +    |
|                    |                  | <i>Flavonifractor sp. An10</i>             | SGB          |      |      | +    | +    |      |      |
|                    |                  | <i>Fournierella massiliensis</i>           | UHGG         |      |      | +    | +    |      |      |
|                    |                  | <i>Gemmiger sp. An194</i>                  | SGB          |      |      | +    | +    |      |      |
|                    |                  | <i>Halothermothrix orenii</i>              | HMP          |      |      |      |      | +    | +    |
|                    |                  | <i>Hungatella effluvii</i>                 | UHGG         |      |      | +    | +    |      |      |
| Firmicutes         |                  | <i>Hungatella hathewayi</i>                | HMP/UHGG/SGB |      |      | +    | +    |      |      |
|                    |                  | <i>Johnsonella ignava</i>                  | SGB          |      |      | +    | +    |      |      |
|                    |                  | <i>[Lachnoclostridium asparagiforme]</i>   | HMP/UHGG/SGB |      |      | +    | +    |      |      |
|                    |                  | <i>Lachnoclostridium saccharolyticum</i>   | HMP/SGB      |      |      | +    | +    |      |      |
|                    |                  | <i>Clostridium lavalense</i>               | UHGG/SGB     |      |      | +    | +    |      |      |
|                    |                  | <i>Lachnoclostridium phytofermentans</i>   | HMP          |      |      | +    | +    |      |      |
|                    |                  | <i>Lactobacillus casei</i>                 | SGB          |      |      | +    | +    |      |      |
|                    |                  | <i>Megasphaera elsdenii/SGB</i>            | UHGG         |      |      |      |      | +    | +    |
|                    |                  | <i>Megasphaera micronuciformis</i>         | SGB          |      |      | +    | +    |      |      |
|                    |                  | <i>Megasphaera sp. DJF_B143</i>            | SGB          |      |      | +    | +    |      |      |
| Firmicutes         |                  | <i>Megasphaera sp. NM10</i>                | SGB          |      |      |      |      | +    | +    |
|                    |                  | <i>Mogibacterium sp. CM50</i>              | SGB          |      |      | +    | +    |      |      |
|                    |                  | <i>Paenibacillus_B thiaminolyticus</i>     | UHGG         |      |      | +    | +    |      |      |
|                    |                  | <i>Eubacterium_yurii</i>                   | SGB          |      |      | +    | +    |      |      |
|                    |                  | <i>Peptoanaerobacter stomatis</i>          | SGB          |      |      |      |      | +    | +    |



|                        |                                      |                                         |              |   |   |   |   |   |   |
|------------------------|--------------------------------------|-----------------------------------------|--------------|---|---|---|---|---|---|
|                        |                                      | <i>Proteus vulgaris</i>                 | UHGG/SGB     |   |   | + | + |   |   |
|                        |                                      | <i>Providencia alcalifaciens</i>        | HMP/UHGG     | + | + | + | + | + | + |
|                        | <i>Providencia</i>                   | <i>Providencia rettgeri</i>             | HMP/UHGG/SGB | + | + | + | + | + | + |
|                        |                                      | <i>Providencia rustigianii</i>          | HMP/UHGG     |   |   | + | + |   |   |
|                        |                                      | <i>Providencia stuartii</i>             | HMP/UHGG     | + | + |   |   | + | + |
|                        |                                      | <i>Pseudomonas citronellolis</i>        | UHGG         | + | + |   |   | + | + |
|                        |                                      | <i>Pseudomonas entomophila</i>          | HMP          | + | + |   |   | + | + |
|                        | <i>Pseudomonas</i>                   | <i>Pseudomonas putida</i>               | HMP          | + | + |   |   | + | + |
|                        |                                      | <i>Pseudomonas oleovorans</i>           | SGB          |   |   |   |   |   | + |
|                        |                                      | <i>Pseudomonas_sp_AU11447</i>           | SGB          | + | + |   |   | + | + |
|                        |                                      | <i>Pseudomonas_sp_M1</i>                | SGB          | + | + |   |   | + | + |
|                        |                                      | <i>Pseudomonas_sp_T</i>                 | SGB          |   | + |   |   |   |   |
|                        | <i>Raoultella</i>                    | <i>Raoultella ornithinolytica</i>       | UHGG/SGB     |   |   | + | + |   |   |
|                        | <i>Rhizobium</i>                     | <i>Rhizobium etli</i>                   | HMP          |   |   |   | + |   |   |
|                        | <i>Ruegeria</i>                      | <i>Ruegeria pomeroyi</i>                | HMP          |   | + |   |   |   |   |
|                        |                                      | <i>Serratia liquefaciens</i>            | UHGG/SGB     | + | + |   |   | + | + |
|                        | <i>Serratia</i>                      | <i>Serratia marcescens</i>              | UHGG         | + | + |   |   | + | + |
|                        |                                      | <i>Serratia ureilytica</i>              | UHGG         | + | + |   |   | + | + |
|                        |                                      | <i>Shewanella benthica</i>              | HMP          |   |   |   | + |   |   |
|                        | <i>Shewanella</i>                    | <i>Shewanella oneidensis</i>            | HMP          |   |   |   | + |   |   |
|                        |                                      | <i>Shigella boydii</i>                  | HMP          | + | + |   |   | + | + |
|                        | <i>Shigella</i>                      | <i>Shigella flexneri</i>                | HMP          | + | + |   |   | + | + |
|                        |                                      | <i>Shigella sonnei</i>                  | HMP          | + | + |   |   | + | + |
|                        | <i>Sorangium</i>                     | <i>Sorangium cellulosum</i>             | HMP          |   |   |   | + |   |   |
|                        | <i>Stenotrophomonas</i>              | <i>Stenotrophomonas rhizophila</i>      | SGB          | + | + |   |   | + | + |
|                        | <i>Syntrophobacter</i>               | <i>Syntrophobacter fumaroxidans</i>     | HMP          |   |   |   | + |   |   |
|                        | <i>Syntrophus</i>                    | <i>Syntrophus aciditrophicus</i>        | HMP          |   |   |   | + |   |   |
|                        | <i>Thiobacillus</i>                  | <i>Thiobacillus denitrificans</i>       | HMP          |   |   |   | + |   |   |
|                        | <i>unclassified Rhodobacteraceae</i> | <i>Rhodobacteraceae bacterium KLH11</i> | HMP          |   | + |   |   |   |   |
|                        | <i>Vibrio</i>                        | <i>Vibrio alginolyticus</i>             | HMP          |   |   |   | + |   |   |
|                        | <i>Vitreoscilla</i>                  | <i>Vitreoscilla massiliensis</i>        | UHGG         | + | + |   |   | + | + |
|                        | <i>Xenorhabdus</i>                   | <i>Xenorhabdus nematophila</i>          | HMP          | + | + |   |   | + | + |
|                        |                                      | <i>Yersinia pestis</i>                  | HMP/UHGG     | + | + |   |   | + | + |
|                        | <i>Yersinia</i>                      | <i>Yersinia pseudotuberculosis</i>      | HMP          | + | + |   |   | + | + |
|                        | <i>Yokenella</i>                     | <i>Yokenella regensburgei</i>           | UHGG         |   |   | + | + |   |   |
| <i>Spirochaetes</i>    | <i>Brachyspira</i>                   | <i>Brachyspira pilosicoli</i>           | HMP          |   |   |   | + |   |   |
|                        | <i>Marinitoga</i>                    | <i>Marinitoga piezophila</i>            | HMP          |   |   |   | + |   |   |
|                        |                                      | <i>Thermotoga maritima</i>              | HMP          |   |   |   | + |   |   |
| <i>Thermotogae</i>     | <i>Thermotoga</i>                    | <i>Thermotoga naphthophila</i>          | HMP          |   |   |   | + |   |   |
|                        |                                      | <i>Thermotoga petrophila</i>            | HMP          |   |   |   | + |   |   |
|                        |                                      | <i>Thermotoga sp. RQ2</i>               | HMP          |   |   |   | + |   |   |
|                        | <i>Akkermansia</i>                   | <i>Akkermansia glycaniphila</i>         | SGB          |   |   |   | + |   |   |
| <i>Verrucomicrobia</i> | <i>Verrucomicrobium</i>              | <i>Verrucomicrobium sp. GAS474</i>      | SGB          |   |   |   | + |   |   |

Supplementary Table 3. Detailed information of public datasets used in this study.

| Abbreviation | Country     | Total number of individuals | The number of healthy individuals | Gender (F/M) | Age (mean±SD) | BMI (mean±SD) | Individuals with colorectal cancer (CRC) | Individuals with adenoma | Individuals with type 2 diabetes | Individuals with impaired glucose tolerance | Individuals with cardiovascular disease | Individuals with hypertension | Individuals with Obesity | Relative abundance of taxonomic classification |                |                |                |                |                |  |
|--------------|-------------|-----------------------------|-----------------------------------|--------------|---------------|---------------|------------------------------------------|--------------------------|----------------------------------|---------------------------------------------|-----------------------------------------|-------------------------------|--------------------------|------------------------------------------------|----------------|----------------|----------------|----------------|----------------|--|
|              |             |                             |                                   |              |               |               |                                          |                          |                                  |                                             |                                         |                               |                          | phylum                                         | class          | order          | family         | genus          | species        |  |
| HZ           | HADZA       | 26                          | 26                                | 9/18         | 32.00±14.93   | -             | -                                        | -                        | -                                | -                                           | -                                       | -                             | -                        | 0.787±0.06737                                  | 0.7059±0.08115 | 0.6969±0.08258 | 0.4731±0.09551 | 0.4142±0.09964 | 0.2638±0.0754  |  |
| CN           | China       | 226                         | 127                               | 26/45        | 33.69±11.02   | 22.33±3.52    | -                                        | -                        | 99                               | -                                           | -                                       | -                             | -                        | 0.9155±0.03474                                 | 0.8795±0.05102 | 0.8762±0.05309 | 0.7269±0.08102 | 0.6614±0.09430 | 0.3540±0.08342 |  |
| JP           | Japan       | 106                         | 98                                | 42/62        | 31.96±10.78   | 21.67±2.260   | -                                        | -                        | -                                | -                                           | -                                       | -                             | -                        | 0.9329±0.02294                                 | 0.8920±0.03415 | 0.8875±0.03531 | 0.7042±0.05880 | 0.6172±0.06044 | 0.3804±0.06251 |  |
| KR           | South Korea | 35                          | 35                                | -            | -             | -             | -                                        | -                        | -                                | -                                           | -                                       | -                             | -                        | 0.8630±0.06961                                 | 0.8078±0.09593 | 0.8022±0.10110 | 0.6292±0.1330  | 0.5720±0.1363  | 0.3717±0.06883 |  |
| DK           | Denmark     | 85                          | 47                                | 24/24        | 54.69±10.70   | 23.24±2.35    | -                                        | -                        | 35                               | -                                           | -                                       | -                             | -                        | 0.8579±0.05343                                 | 0.7964±0.07331 | 0.7875±0.07730 | 0.6065±0.08619 | 0.5614±0.09394 | 0.3300±0.05661 |  |
| SE           | Sweden      | 145                         | 35                                | 36/0         | 70.36±0.73    | 24.32±2.93    | -                                        | -                        | 53                               | 49                                          | -                                       | -                             | -                        | 0.8748±0.03471                                 | 0.8072±0.05319 | 0.7994±0.05695 | 0.6000±0.07385 | 0.5350±0.08098 | 0.3982±0.0653  |  |
| AT           | Austria     | 156                         | 41                                | 19/22        | 66.37±7.21    | 25.63±3.21    | 46                                       | 44                       | -                                | -                                           | -                                       | -                             | -                        | 0.8081±0.08061                                 | 0.8089±0.08903 | 0.8025±0.09075 | 0.6309±0.1050  | 0.5315±0.09511 | 0.4079±0.07749 |  |
| FR           | France      | 156                         | 51                                | 30/25        | 60.62±11.88   | 23.97±2.41    | 53                                       | 42                       | -                                | -                                           | -                                       | -                             | -                        | 0.8655±0.04605                                 | 0.8088±0.06319 | 0.8022±0.06595 | 0.6360±0.07894 | 0.5702±0.08355 | 0.3792±0.06439 |  |
| AU           | Australia   | 25                          | 25                                | -            | -             | -             | -                                        | -                        | -                                | -                                           | -                                       | -                             | -                        | 0.8520±0.04775                                 | 0.8066±0.06033 | 0.7966±0.06714 | 0.6492±0.08069 | 0.6145±0.08653 | 0.3343±0.05526 |  |
| US           | America     | 300                         | 148                               | 66/82        | -             | -             | -                                        | -                        | -                                | -                                           | -                                       | -                             | -                        | 0.9178±0.04441                                 | 0.8876±0.064   | 0.8843±0.06679 | 0.7525±0.1006  | 0.7237±0.1196  | 0.3058±0.0755  |  |
| PE           | Peru        | 36                          | 12                                | 12/19        | 20.43±15.55   | 20.55±4.15    | -                                        | -                        | -                                | -                                           | -                                       | -                             | -                        | 0.7553±0.06890                                 | 0.6674±0.09728 | 0.6614±0.09986 | 0.4607±0.1286  | 0.4051±0.1214  | 0.2864±0.07902 |  |
| ACVD*        | China       | 385                         | 171                               | 154/226      | 60.74±9.87    | 24.52±5.48    | -                                        | -                        | -                                | -                                           | 214                                     | -                             | -                        | 0.9144±0.03432                                 | 0.8706±0.05301 | 0.8667±0.05539 | 0.7131±0.08385 | 0.6304±0.09955 | 0.3709±0.07515 |  |
| HT           | China       | 196                         | 99                                | -            | -             | -             | -                                        | -                        | -                                | -                                           | -                                       | 97                            | -                        | 0.9101±0.04198                                 | 0.8754±0.06105 | 0.8704±0.06388 | 0.7265±0.09289 | 0.6770±0.1060  | 0.4171±0.1290  |  |
| OB           | China       | 257                         | 105                               | -            | -             | -             | -                                        | -                        | -                                | -                                           | -                                       | 152                           | -                        | 0.9198±0.03181                                 | 0.8838±0.04757 | 0.8810±0.04930 | 0.7298±0.07745 | 0.6784±0.09362 | 0.3827±0.08503 |  |
| Total        |             | 2134                        | 1020                              |              |               |               | 99                                       | 86                       | 187                              | 49                                          | 214                                     | 97                            | 152                      |                                                |                |                |                |                |                |  |

**Supplementary Table 4. Homologous modeling and molecular docking between cutC sequences of trains from cutC abundant strains and coline.**

| Genus                    | Source of strain                                   | Protein sequence                                                                                                                                                                                                                                                                                                                                                                                                                                                                                                                                                                                                                                                                                                                                                                                                                                                                                                                             |
|--------------------------|----------------------------------------------------|----------------------------------------------------------------------------------------------------------------------------------------------------------------------------------------------------------------------------------------------------------------------------------------------------------------------------------------------------------------------------------------------------------------------------------------------------------------------------------------------------------------------------------------------------------------------------------------------------------------------------------------------------------------------------------------------------------------------------------------------------------------------------------------------------------------------------------------------------------------------------------------------------------------------------------------------|
|                          | <i>Lachnoclostridium saccharolyticum</i> WMI       | LKEREIRLDIREFSNKFVEATKNMTPEERASLMKMFETVSDEINKKESSSQAAACCEGGT<br>EVPEGITPRLQKLKDNYLTHKPSITTYRARAITKIAKENPGMPKIMLRACFRYCCETAP<br>LVIQDNELIVGAPCGAPRAGAFSPDIAWRWMVDEIDTIGTRPQDPFYISEEDKKIMKEEL<br>FPYWAGKSVDEYCEDQYREAGVWELSGESFVSDCSYHAINGGGDSNPGYDVILMKGMLD<br>IQQEAKDHLKELDYENPDDIEKIYFYKSIIDTTEGVMIYAKRLSEYAAELAASETNPKRK<br>EELLKISEVNAAYVPAHKPRTFWEAIQAVWTIESLLVVEENQTGMSIGRVDQYMYPFYKDD<br>IESGRMNDYQAFELAGCMLIKMSEMMWITSEGGSKFFAGYQPFVNMCVGGVTRSGHDATN<br>DLTYLLMDAVRHVKIYQPSLACRIHNKSPKMYMKKIVDVVRSRGMGFPACHFDDAHIKMML<br>AKGVSIEDARDYCLMGCVEPQKSGRLYQWTSTAYTQWPICIELVLNHGAPLWYGKQVCPD<br>MGDLSNFKTYEEFEAAVKKEIKYITKWDVATVISQRVHRDLAPKPLMSIMYEGCMEKAK<br>DVSAGGAMYNFGPGVVWSGLATYADSMIAIKKLVFEEKKYTLEQLNQALKADFGYDQIR<br>TDCLNAPKYGNDDDYADLIAADLVDFTEHEHRKYKTLYSVLSHGTLSSISNNTPFQMTGA<br>SANGRNAWLPLSDGISPTQGADFKGPTAIKSVSKMSNDSMNIGMVHNFKIMAGLLDTPE<br>GEESLITLLRTACMFGNGEMQFNLYLDNDTLVEAQKHPELYRDLIVRVAGYSAFFVELCKD<br>VQDEIISRTMLTHF |
| <i>Lachnoclostridium</i> | <i>[Lachnoclostridium asparagiforme]</i> DSM 15981 | DEIDTIGSRPQDPFYISEEDKKIMREELFPFWKGSVDEYCEDQYREAGVWELSGESFVS<br>DCSYHALNNGGGDSNPGYDVILMKGMLDIQQAAREHLEQLDYENPDDIEKIYFYKSIIDT<br>TEGVMIYARRMSEYAAQLAAKEQNPRRREELLKISEVNARVPAHKPETFWEAIQAVWTIE<br>SLLVVEENQTGMSIGRVDQYMYPFYKGDIASGRLNDRQAFELAGCMLIKMSEMMWITSEG<br>GSKFFAGYQPFVNMCVGGVTRDGRDATNELTYLLMDAVRHVRIYQPSLACRIHNKSPKMY<br>LKKIVDVVRSRGMGFPACHFDDAHIKMMLAKGVSIEDARDYCLMGCVEPQKSGRLYQWTST<br>SYTQWPICIELALNHGVPLWYGKQVCPDMGDPDRFKTYEEFEAAVKDEIKFITKWTAVAT<br>VISQRVHKELAPKPLMSIMYEGCMEKGRDVSAGGAMYNFGPGVIWSGLATYADSMIAIRK<br>LVFDDRKYTLSQINEALKADFAFDQLRIDCLNAPKYGNDDDYADLIAADLVNFTEHEHR<br>KYKTLYSTLSHGTLSSISNNTPFQMTGASANGRHAWLPLSDGISPTQGADFKGPTAIKS<br>VSKMSNDSMNIGMVHNFKIMAGLLDTPEGEESLITLLRTACMFGNGEMQFNLYLDNNTLIE<br>AQKHPEQYRDLIVRVAGYSAFFVELCKDVQDEIISRTMLTHF                                                                                                                                                                    |
|                          | <i>Lachnoclostridium phytofermentans</i> ISDg      | LDIREFSNKFVEATKNMSPEERSLLMCMFETVSDEINKKETAPSTSNVCNEEGSNIPDGI<br>TPRLHKLKENYLTHKPTITTYRARAITKIAKENPGMPKIMLRACFRYCCETAPLVIQDN<br>ELIVGAPCGAPRAGAFSPDIAWRWMVDEIDTIGTRPQDPFYISEEDKKIMKEELFPFWAG<br>KSVDEYCEDQYREAGVWELSGESFVSDCSYHAINGGGDSNPGYDVILMKGMLDIQQA<br>DHLKELDYENPDDIEKIYFYKSIIDTTEGVMIYAKRLSEYAAELAASETNPKRKEELKI<br>SEVNAAYVPAHKPRTFWEAIQAVWTIESLLVVEENQTGMSIGRVDQYMYPFYKDDIESGRM<br>NDYQAFELAGCMLIKMSEMMWITSEGGSKFFAGYQPFVNMCVGGVTRSGRDATNDLTYLL<br>MDAVRHVKIYQPSLACRIHNKSPKEYLKKIVDVVRSRGMGFPACHFDDAHIKMMLAKGVS<br>IEDARDYCLMGCVEPQKSGRLYQWTSTAYTQWPICIELVLNNGVPLWYGKQVCPDMGALS<br>NFKTYEEFEAAVKKEIKYITKWDVATVISQRVHRDLAPKPLMSIMYEGCMESAKDVSAGG<br>AMYNFGPGVVWSGLATYSDSMIAIKKLVFDEKKYTLQNEALKADFAFDQIRTDCLNA<br>PKYGNDDDYADLIAADLVDFTEHEHRKYKTLYSILCHGTLSSISNNTPFQMTGASANGRH<br>AWLPLSDGISPTQGADFNPTAIKSSISKMANDSMNLGMVHNFKIMSGLLDTPEGEESLI<br>TLLRTACMFGNGEMQFNLYLDNNTLIDAQKHPEKYRDLIVRVAGYSAFFIELCKDVQDEI<br>SRTMLTHF             |
|                          | <i>Clostridium sporogenes</i> ATCC 15579           | MEATKNMSDEERAGLMKMFQSVSNEITKEEPATSKVACDNNGEIPDGMTERLVKLNENYM<br>KHVPSITTHRARAITKIAKENPGIPKSVLRGKCFKHCCETAPLLIQDHELIVGAPNGKPR<br>AGAFSPDIAWRWMVDEIDTIGTRPQDPFYISEEDKKIMREELFPYWAGKSVDEYCEDQYR<br>EAGVWELSGESFVSDCSYHAVNNGGGDSNPGYDVVLMKKGMLDIKREAEKLAELKYENPE<br>DIDKIYFYKSLIDTAEGVMIYAKRMSDYAAELAQKETNPKRKAELQKISEINARVPAHKP<br>STYWEAIQAVWTIESLLVVEENQTGMSIGRVDQYMYPFYKADIEAGRMTDYEAFELSGCM<br>LIKSEMMWITSEGGSKFFAGYQPFVNMCVGGVTRDGRDATNELTYLLMDAVRHVKIYQ<br>PSLACRIHKGSPQKYLKIVDVIRAGMGFPACHFDDVHIKIMLAKGVSIEDARDYCLMGC<br>VEPQKSGRLYQWTSTGYTQWPICIELVLNHGVPLWYGKQVCPDMGDLSQFKTYEQFEAAV<br>KQIKFITKWTAVATVISQRVHKELAPKPLMSIMYEGCMENGGKVEAGGAMYNFGPGVVWS<br>GLATYTDSMIAIKKLVFEDKKYTLQEMNEALKADFGYEQKQKDCLEAPKYGNDDDYADL<br>IAADLINFTEQHRKYKTLYSVLSHGTLSSISNNTPFQMTGATANGRRAWMPLSDGISPS<br>QGADFKGPTSIKSVSKMSCEDMNIGMVHNFKLISGLLDTPGEQGIITLLRSACALQLG<br>EVQFNLYLDNNTLIEAQKHPDQYRDLIVRVAGYSAFFVELCKDVQDEIISRTMLTHF                           |



|                                                                      |                                                                                                                                                                                                                                                                                                                                                                                                                                                                                                                                                                                                                                                                                                                                                                                                                                                                                                                                                                                                                                                                                               |                                                                                                                                                                                                                                                                                                                                                                                                                                                                                                                                                                                                                                                                                                                                                                                                                                                                                                                                                                                                                                                             |
|----------------------------------------------------------------------|-----------------------------------------------------------------------------------------------------------------------------------------------------------------------------------------------------------------------------------------------------------------------------------------------------------------------------------------------------------------------------------------------------------------------------------------------------------------------------------------------------------------------------------------------------------------------------------------------------------------------------------------------------------------------------------------------------------------------------------------------------------------------------------------------------------------------------------------------------------------------------------------------------------------------------------------------------------------------------------------------------------------------------------------------------------------------------------------------|-------------------------------------------------------------------------------------------------------------------------------------------------------------------------------------------------------------------------------------------------------------------------------------------------------------------------------------------------------------------------------------------------------------------------------------------------------------------------------------------------------------------------------------------------------------------------------------------------------------------------------------------------------------------------------------------------------------------------------------------------------------------------------------------------------------------------------------------------------------------------------------------------------------------------------------------------------------------------------------------------------------------------------------------------------------|
| <p><i>Clostridium botulinum E1</i><br/><i>str. BoNT E Beluga</i></p> | <p>MRGKKLDIREFSNKFVEATQNMSAEERECLMKIFEGVSKEITKEEPVLEHVVCTEGDKIP<br/>         DGITQRLLKLENYLKQVPSITTYRARAITKIAKENPGMPKILLRAKCFKYCCETAPLVI<br/>         QDNELIVGAPCGAPRAGAFSPDIAWRWMVDEIDTIGTRAQDPFYISEEDKKIMREELFPY<br/>         WAGKSVDEYCNQYREAGVWELSGESFVSDCSYHAINGGGDSNPGYDVILMKGMLDIQL<br/>         EAKEHLEKLDYENPEHIEKIYFYKAIIDTTEGVMYAKRLSKYAAELAEKETNPKRKSEL<br/>         QKISEINARVPAHKPSTFWIAIQAVWTIESLLVVEENQTGMSIGRVDQYMYEYYKNDIES<br/>         GRMNDFEAFELSGCMLIKMSEMMWITSEGGSKFFAGYQPFVNMVGGVDRQGRDATNELT<br/>         YLLMDAVRHVKIYQPSLACRIHNQSPQKYLKKIVDVIRAGMGFPACHFDDVHIKMMMLAKG<br/>         VSIEDARDYCLMGCVEPQKSGRLYQWTSTAYTQWPICIELVLNNGIPLWYEQVCPNMGD<br/>         INSFKNYEEFESAVKEQIKYITKWTSVATVISQRVHKELAPKPLMSIMYEGCMDNNGRVE<br/>         AGGAMYNFGPGVIWVSLATYTDMSMAAIKLVFEEKKYTLQELNEALKADFGVYKLRKDC<br/>         LEAPKYGNDDDYADYIAADLINFTELEHRKFKTLYSVLSHGTLSSISNNTPFQGLTGATAN<br/>         GRRAWMPLSDGISPSQGSYKGPATIIKSVSKMSCDSMNIGMVHNFKLISGLLDTKEGED<br/>         GIITLLRSACVGLGEVQFNLDNDTLIEAQKHPEQYRDLIVRVAGYSAFFVELCKDVQD<br/>         EIISRTMLTHF</p>        |                                                                                                                                                                                                                                                                                                                                                                                                                                                                                                                                                                                                                                                                                                                                                                                                                                                                                                                                                                                                                                                             |
| <p><i>Clostridium botulinum</i><br/><i>A2 str. Kyoto</i></p>         | <p>MEATKNMSDEERAGLMKMFQSVSNEITREEPATSKVACDNNGEIPDGMTERLVKLEKTYL<br/>         KHVPTITTHRARAITKIAKENPGTPKSVLRGKCFKHCCETAPLVIQDNELIVGAPNGQPR<br/>         AGAFSPDIAWRWMVDEIDTIGTRPQDPFYISEEDKKIMREELFPYWAGKSVDEYCEDQYR<br/>         EAGVWELSGESFVSDCSYHAVNNGGDSNPGYDVVLMKKGMLDIKREAEKLAELKYENPE<br/>         DIDKIYFYKSLIDTAEGVMYAKRMSDYAAELAQKETNPKRKAELLKISEINARVPAHKP<br/>         STYWEAIQAVWTIESLLVVEENQTGMSIGRVDQYMYPFYKADIEAGRMTDYEAFELSGCM<br/>         LIKSEMMWITSEGGSKFFAGYQPFVNMVGGVTREGRDATNELTYLLMDAVRHVKIYQPSL<br/>         ACRIHKSPPQKYLKKIVDVIRAGMGFPACHFDDVHIKIMMLAKGVSIEDARDYCLMGCV<br/>         EPQKSGRLYQWTSTGYTQWPICIELVLNNGVPLWYKQVCPMDGDLQFKTYEQFEAAVK<br/>         EQIKFITKWTSVATVISQRVHKELAPKPLMSMMYEGCMENGRGVEAGGAMYNFGPGVWVS<br/>         GLATYADSMAAIKLVFEDKKYTLQEMNEALKADFGVYEQRLKDCLEAPKYGNDDDYADL<br/>         IAADLINFTEQEHRKYKTLYSVLSHGTLSSISNNTPFQMTGATANGRRAWMPLSDGISPS<br/>         QGADFKGPTSIIKSVSKMSCEDMNIGMVHNFKLIAGLLDTPEGEQGIITLLRSACALQLG<br/>         EVQFNLDNKTLIEAQKHPDOYRDLIVRVAGYSAFFVELCKDVQDEIISRTMLTHF</p>                                    |                                                                                                                                                                                                                                                                                                                                                                                                                                                                                                                                                                                                                                                                                                                                                                                                                                                                                                                                                                                                                                                             |
| <p><i>Clostridium</i></p>                                            | <p><i>Clostridium botulinum Bf</i></p>                                                                                                                                                                                                                                                                                                                                                                                                                                                                                                                                                                                                                                                                                                                                                                                                                                                                                                                                                                                                                                                        | <p>MEATKNMSDEERAGLMKMFQSVSNEITKEETTAPKVACDNNGEIPDGMTERLVKLEKENYM<br/>         KHVPTITTHRARAITKIAKENPGTPKSVLRGKCFKHCCETAPLVIQDNELIVGAPNGQPR<br/>         AGAFSPDIAWRWMVDEIDTIGTRPQDPFYISEEDKKIMREELFPYWAGKSVDEYCEDQYR<br/>         EAGVWELSGESFVSDCSYHAVNNGGDSNPGYDVVLMKKGMLDIKREAEKLAELKYENPE<br/>         DIDKIYFYKSLIDTAEGVMYAKRMSDYAAELAQKETNPKRKAELQKISEINARVPAHKP<br/>         STYWEAIQAVWTIESLLVVEENQTGMSIGRVDQYMYPFYKADIEAGRMTDYEAFELSGCM<br/>         LIKSEMMWITSEGGSKFFAGYQPFVNMVGGVTREGRDATNELTYLLMDAVRHVKIYQPSL<br/>         ACRIHKGSPQKYLKKIVDVIRAGMGFPACHFDDVHIKMMMLAKGVSIEDARDYCLMGCV<br/>         EPQKSGRLYQWTSTGYTQWPICIELVLNHGVPLWYKQVCPMDGDLQFKTYEQFEAAVK<br/>         EQIKFITKWTSVATVISQRVHKELAPKPLMSMMYEGCMENGRGVEAGGAMYNFGPGVWVS<br/>         GLATYADSMAAIKLVFEDKKYTLQEMNEALKADFGVYEQRLKDCLEAPKYGNDDDYADY<br/>         IASDLINFTEQEHRKYKTLYSVLSHGTLSSISNNTPFQMTGATANGRRAWMPLSDGISPS<br/>         QGADFKGPTSIIKSVSKMTCEDMNIGMVHNFKLISGLLDTPEGEQGIITLLRSACALQLG<br/>         EVQFNLDNKTLIEAQKHPEQYRDLIVRVAGYSAFFVELCKDVQDEIISRTMLTHF</p> |
| <p><i>Clostridium</i><br/><i>carboxidivorans P7</i></p>              | <p>MKYLKECEVINLDIREFSSKFMEATKNMTEERASLMKMFSSVSKEITKEEPAHICVTGD<br/>         NNGQIPDGITERLVKLEKTYLKHVPSITTHRARAITKIAKENPGIPKSVLRGKCFKHCC<br/>         TAPLVIQDNELIVGAPNGQPRAGAFSPDIAWRWMVDEIDTIGTRPQDPFYISEEDKKIMR<br/>         EELFPYWQKSVDEYCEDQYREAGVWELSGESFVSDCSYHAVNNGGDSNPGYDVILMKG<br/>         MLDIKREAEDKLAELNYENPEDIDKIYFYKSLIDTAEGVMYAKRMSDYAAELAASETNP<br/>         KRKAELQKISEVNARVPAHKPSTYWEAIQSVWTIESLLVVEENQTGMSIGRVDQYMYPFY<br/>         KADIEAGRMTDFEAFELSGCMLIKMSEMMWITSEGGSKFFAGYQPFVNMCLGGVTREGRD<br/>         ATNDLTYLLMDAVRHVKIYQPSLACRIHKASPPQKYLKKIVDVIRAGMGFPACHFDDVHIK<br/>         IMLAKGVSIEDARDYCLMGCVEPQKAGRLYQWTSTGYTQWPICIELVLNHGVPLWYKQV<br/>         CPNLGDLNFKTYEQFEAAVKEQIKYITKWTSVATVISQRVHKDLAPKPLMSMMYEGCME<br/>         KGRGVEAGGAMYNFGPGVWVWGLATYTDMSMAAIKLVFDDKKYTLQEMNEALKADFAGYE<br/>         QLRKDCLEAPKYGNDDDYADLIAADLINFTEQEHRKYKTLYSVLSHGTLSSISNNTPFQGL<br/>         TGATANGRRAWTPLSDGISPTQGADYKGPSTIIKSVSKMSCEDMNIGMVHNFKLIAGLLD<br/>         TPEGEQGIITLLRSACALQLGEMQFNLDNKTLDAQKHPEEYRDLIVRVAGYSAFFVEL<br/>         CKDVQDEIISRTVLTHF</p> |                                                                                                                                                                                                                                                                                                                                                                                                                                                                                                                                                                                                                                                                                                                                                                                                                                                                                                                                                                                                                                                             |

|                           |                                                                                       |                                                                                                                                                                                                                                                                                                                                                                                                                                                                                                                                                                                                                                                                                                                                                                                                                                                                                                                                                                                                                                                                                                                                                                                                                                                                         |
|---------------------------|---------------------------------------------------------------------------------------|-------------------------------------------------------------------------------------------------------------------------------------------------------------------------------------------------------------------------------------------------------------------------------------------------------------------------------------------------------------------------------------------------------------------------------------------------------------------------------------------------------------------------------------------------------------------------------------------------------------------------------------------------------------------------------------------------------------------------------------------------------------------------------------------------------------------------------------------------------------------------------------------------------------------------------------------------------------------------------------------------------------------------------------------------------------------------------------------------------------------------------------------------------------------------------------------------------------------------------------------------------------------------|
|                           | <p><i>Clostridium ljungdahlii</i><br/>DSM 13528</p>                                   | <p>LDIREFSNKFAEATKNMSAEEQAALMKIFQGVSQEITKEDNGAPAVSAEPCTNNGEVPNG<br/>MTERLKRIKENYLKQKPSITTYRAKAITKIAKENPGMPKILLRAKCFRYCCETAPLVIQD<br/>DELIVGAPCGAPRAGAFSPDIAWRWMQDEIDTIGTRPQDPFYVSEEDKKVMREELFPFWQ<br/>GKSVDEYCEDQYREAGVWELSGESFVSDCSYHATNGGGDSNPGYDVILMKKGMADIQQA<br/>KDHLAKLDYENPEDIEKIYFYKSVIDTTEGVMYAKRMSEYAAELAASETNPKRKAELQK<br/>ISEVNAHVPAHKPSNFWWEAIQSVWTIESLLVVEENQTGMSIGRVDQYMPFYKADIESGR<br/>MNNYEAFELAGCMLIKMSEMMWVTSEGASKFFAGYQPFVNMVGGVTRDGLDATNDLTYL<br/>LMDAVRHVKIYQPSLACRIHNKSPKKYLKIVDVVRAGMGFPACHFDDAHIKMMLAKGVS<br/>IEDARDY CIMGCVEPQKAGRLYQWTSTAYTQWPICIELVLNHGVPLWYGKQVCPDMGDLN<br/>RFKTYEEFDAAVKEEIKYITK WTDVATVISQRVHRDLAPKPLMSIMYEGCMEHGKDVSA<br/>GAMYNFGPGVWWTGLATYADSMAAIKVVFDKCTLEQLNQALKADDFVGYEELRNDCLK<br/>APKYGNDDDYADLIAADLINFTEMEHRKYKTLYSVLSHGTLSSISNNTPFQLTGASANGR<br/>KAWTPLSDGISPTQGADFKGPTAIKSVSKMSCDNMIGMVHNFKLMAGLLETPEGEEGI<br/>ITLLRTACLFNGQMNFNYLDNKTLIEAQKHPEQYRDLIVRVAGYSAFFVELCKDVQDEI<br/>ISRTMLTHF</p>                                                                                                                                                                                                                                                                                                                  |
|                           | <p><i>Clostridium tetani</i> E88</p>                                                  | <p>MEATKNMSDEERNGLMNMFQSSISKEIKKEEKVTSNVVFNNGEIPDGMTERLIKLENYM<br/>KQVPSITTHRARAITKIAKENPGVPSVLRGKCFKYCCETAPLVIQDNELIVGAPNGKPR<br/>AGAFSPDIAWRWMEDEIDTIANRPQDPFYISEEDKKIMREELFPYWKGSVDEYCEDQYR<br/>EAGVWELSGESFVSDCSYHAVNGGGDSNPGYDVILMKKGMLDIKREAEELASLSYERPE<br/>DIEKIYFYKSIIDTAEGVMYAKRMSDYAAELAASETDPKRKAELQKISKVNARVPAHKP<br/>STFWWEAIQAVWTIESLLVVEENQTGMSIGRVDQYMPFYKSDIESGRMTDFEAFELAGCM<br/>LIKMSEMMWITSEGGSKFFAGYQPFVNMVGGVTRDGLDATNELTYLLMDAVRHVKIYQPS<br/>SLACRIHKGSPQKYLKIVDVIRAGMGFPACHFDDVHIKMMMLAKGVSIEDARDYCLMGCV<br/>EPQKSGRLYQWTSTGYTQWPICIELVLNHGVPLWYGKQVCPDMGDLSDQFKTYEQFEGAVR<br/>EQIKYITKWTAVATTISQRVHRELAPKPLMSMMYEGCMEKGRGVEAGGAMYNFGPGVWVS<br/>GLATYTDSMAAIKLVFEEKKYTLEELSEALKADDFVGYERLRKDCLEAPKYGNDDDYADY<br/>IAADLVNFTEQHRKYKTLYSVLSHGTLSSISNNTPFQMTGATANGRRAWMPLSDGISPS<br/>QGSDFKGPSTSIKSVSKISCEDMIGMVHNFKLMGSLDTPEGEQGIIALLRSACALQLG<br/>EIQFNLYDNETLIEAQKHPEQYRDLIVRVAGYSAFFVELCKDVQDEIISRTMLTHF</p>                                                                                                                                                                                                                                                                                                                                   |
| <p><i>Klebsiella</i></p>  | <p><i>Klebsiella pneumoniae</i><br/>subsp. <i>rhinoscleromatis</i><br/>ATCC 13884</p> | <p>MAHYNLTPRVKVLADRLLAQKSTLCTEHATTLNALDGDIAGVPAAVKPARRFYELMRQLP<br/>LTISADELIVGNQTRKPHGAIFHDENATRRPSVFQFLNLSNELDSPDYKLVVEKGVLAIK<br/>HQLEEKTRALGSAVSRSGMDEVNGCRAAIYACDALLALAQNLANSAEQAAAETNAYRKA<br/>ELLDSAAILHHVPAHPARNFKEACQAFYLFQALQLDNGSYAVNPQGADIALLPYFQDI<br/>NSGALNTQQAYEIVECLWFKLAELSEIRAACAIDGYPMLDAMLHGAAFDHAEVNELSAMF<br/>ISAQRNLSALNLPVRMFSGVQPVSHAPFAACADTPAMEGLTPRMQRLRNHYLTVRPSVSI<br/>YRALAFTEVVKANPGMPTILLRAKAFRHACETAPILIQDDELIVGHPCGKPRAGAFSPDI<br/>AWRWVRDELDTMSTRPQDPFEISEADKKTIREEIVPFWEGRSLDEICEAQYREAGVWAFS<br/>GETFVSDLSYHQINGGGDTCPGYDVLLFTKGMNGIKADAEAHLASLSMENPEDIDRIYYY<br/>KAAIETCEGVVNYARRIAAHARELAAKEQNAQRRRAELLTIAVYVNVNVPANPPKTLQEALQ<br/>SIWTVESLFEIEENQTGLSLGRVDQYSYPMFEADIREGRLTHDSALELLQAFIHKCAELM<br/>WMSELGAKYFAGYQPFINLTVGGQKRSBGDACCNDLTYLMDAVRFVKVYQPSLACRIHN<br/>QSPQKMEKIVDVVKAGMGFPACHFDDSHIKMMLRKGDFDFEDARDYCLMGCVEPQKSGRI<br/>YQWTSTGYTQWPPIAEFVLRNRMVLFDSYQGLDGTDLRDLRTFEDFDAAVKQQIAHIVR<br/>LSAIGTVISQRVHRDVAPKPLMSLLVEGCMESGKDVAAGGAMVNHGPGGLIFSGLATYVDS<br/>MAAIRKLVFEEKKYTLEQIRDALLANFEGYEALRRDCLNAPKYGNDDNYVDQYALDITEW<br/>TEKECRKYKMLYSTLSHGTLSSISNNTPIGELTNATPNGRLAWMPLSDGISPTQGADKQGP<br/>TAIIKSVSKMNVETMSIGMVHNFKFLKGLDTPEGRHGLITLLRTASILGNGQMQFSYVD<br/>NEVLKKAQQEPEKYRDLIVRVAGYSAYFVELCKEVQDEIISRTVIEKF</p> |
| <p><i>Escherichia</i></p> | <p><i>Escherichia fergusonii</i><br/>ATCC 35469</p>                                   | <p>MANYNLTPRVKVLAEERLLAHPSTLCVEHAGILSGLDGDIAGIPAAVVKPARRFYELMRQLP<br/>LAVSPDELIVGNQTHRPHGAIFHDESTAHRPSVFQFLNLSNDLDAPDYKLVIEKGVLAIK<br/>QQLEEKTRSLGSAVSRSGMDEVNACRAAIYACDALMQLAQNLAESAELAAETNAYRKA<br/>ELSESAAILHHIPAHPARSFKEACQAFYLFQALQLDNGSYAVNPEGADKALLAYYQHDI<br/>ANGLLTEAQAYEIVECLWFKLAELSEVRAACAIDGYPMFDALLHGASLENVINPLSEMF<br/>LNAQRNLSALNLPVRLFHGAHKTVTTPFAACSETPVLEGLTPRIQRLRNHYLTVRPSVSI<br/>YRALAFTEVVKANPGMPAILLRAKAFRHACETAPILIQNDELIVGHPCGKPRAGAFSPDI<br/>AWRWVRDELDTMSTRPQDPFEISEEDKKTIREEIVPFWEGRSLDEICEAQYREAGVWSFS<br/>GETFVSDLSYHQVNGGGDTCPGYDVLLFTKGMNGIKADAEAHLAELSMENPEDIDRIYYY<br/>KAAIETCEGVINYAHRIAARARELAAVEQNAQRRRAELLTIAEVNQNVPANPPKTLQEALQ<br/>SIWTVESLFEIEENQTGLSLGRVDQYCYPMFEADIREGRLTHEGAELMQAFIHKCAELM<br/>WMSELGAKYFAGYQPFINLTVGGQKRSBGDACCNDLTYLMDAVRFVKVYQPSLACRIHN<br/>QSPQKMEKIVDVVKAGMGFPACHFDDSHIKMMLRKGDFDFEDARDYCLMGCVEPQKSGRI<br/>YQWTSTGYTQWPPIAEFVLRNRMVLFDSYQGLDGTDLKDLRTFEDFDAAVKQVAHIIR<br/>LSAIGTVISQRVHRDVAPKPLMSLLVEGCMESGKDVSAGGAMVNHGPGGLIFSGLATYVDS<br/>MAAIRKLVYEDKKYTLEQIRDALLANFEGYEGLRRDCLNAPKYGNDDNYVDQYALDITEW<br/>TEREKRKYKMLYSTLSHGTLSSISNNTPIGELTNATPNGRLAWMPLSDGISPTQGADKHGP<br/>TAIIKSVSKMNVETMNIGMVHNFKFLKGLDTPEGRNGLITLLRTASILGNGQMQFSYVD<br/>NEVLKKAQQEPEKYRDLIVRVAGYSAYFVELCKEVQDEIISRTVIEKF</p>   |

|                     |                                             |                                                                                                                                                                                                                                                                                                                                                                                                                                                                                                                                                                                                                                                                                                                                                                                                                                                                           |
|---------------------|---------------------------------------------|---------------------------------------------------------------------------------------------------------------------------------------------------------------------------------------------------------------------------------------------------------------------------------------------------------------------------------------------------------------------------------------------------------------------------------------------------------------------------------------------------------------------------------------------------------------------------------------------------------------------------------------------------------------------------------------------------------------------------------------------------------------------------------------------------------------------------------------------------------------------------|
| <i>Enterobacter</i> | <i>Enterobacter cancerogenus</i> ATCC 35316 | MKIDALSLRVRQLRDNYLQAKPFVSARRAISVTRVYKENPGMDNTLLRALAFRRACENAP<br>LYVADNELIVSHPAGGARGGEISPEISWRWVADELDTLPQRAQDPYQIDDETKRLLREEV<br>FPYWEGRSLDEMAQTQLQVLGLWEWCHDDGICDVTIKTQNGGGDSCPGYDNILLTKGIKG<br>IREEAAARLAAVDPASPEGAEAFNFYTAMLHTCDGVLTYPARRYAARLSELAETEGDPLRQ<br>DELRHLADICRRVPEHPPRHFDALQAIWFVHSLFTLEENQTGISLGRVDQYLWPLLERD<br>LNDGVLTHAQAEELLCCWLIKMAETLWICSESTAMYFAGYQPFINLVVGGQKREGGDATN<br>PLTLMIMDCSAQLKIYQPGLAVRIHNQSPQPFMRKVVDVVRSGMGFPACHFDDAHIRMML<br>HKGFSYEDARDYCLMGCVEPQKAGKMYQWTSVGYTTFTAIEALRNGRSSAGKPCGPAT<br>GEVSAFSCYDDVERAVRTQLSAIVRKAQAATLIVQKLHADYARKPLMSSLIDGCMATAKD<br>VTQGGATLNAGPLIWTGLADCVNSLMAIRTLVFETQRFTLQQVVDALHNFGHDDILT<br>ACLRAPKYGNDIRAVDEIARELVRFLEQHRQYRMLYAPFAFGTLSISNNTPFGLITGAL<br>PSGRLAGKPLADGISPSQQTGYLGPTAIINSVSRINVEEMDIGMVHNIKLMYGMLETPEG<br>QNSLIHLLRTASILGNAQLQFSYVDDDTLRQAQQNPGDYRNLNLMIRVAGYSAFFVELSKEV<br>QDEIISRTTQRHF |
|---------------------|---------------------------------------------|---------------------------------------------------------------------------------------------------------------------------------------------------------------------------------------------------------------------------------------------------------------------------------------------------------------------------------------------------------------------------------------------------------------------------------------------------------------------------------------------------------------------------------------------------------------------------------------------------------------------------------------------------------------------------------------------------------------------------------------------------------------------------------------------------------------------------------------------------------------------------|

**Supplementary Table 5. List of primers for rt-qPCR.**

| <b>Gene name</b>               | <b>forward</b>          | <b>reverse</b>          |
|--------------------------------|-------------------------|-------------------------|
| <i>I6S</i>                     | TGTGTAGCGGTGAAATGCG     | CATCGTTTACGGCGTGGAC     |
| <i>L.sac</i>                   | GCAGATGGGCCACTGGGTATA   | TCCACAACAAGTCCCCGAAAA   |
| <i>beta (Actb)</i>             | GGGAAATCGTGCGTGAC       | AGGCTGGAAAAGAGCCT       |
| <i>IL-1<math>\beta</math></i>  | GCAACTGTTCCCTGAACTCAACT | ATCTTTTGGGGTCCGTCAACT   |
| <i>IL-6</i>                    | CCAAGAGGTGAGTGCTTCCC    | CTGTTGTTTCAGACTCTCTCCCT |
| <i>TNF-<math>\alpha</math></i> | CCCTCACACTCAGATCATCTTCT | GCTACGACGTGGGCTACAG     |
| <i>CD68</i>                    | TGTCTGATCTTGCTAGGACCG   | GAGAGTAACGGCCTTTTTGTGA  |
| <i>F4/80</i>                   | TGACTCACCTTGTGGTCCTAA   | CTTCCCAGAATCCAGTCTTTCC  |
| <i>Ccl 2(MCP-1)</i>            | TTAAAAACCTGGATCGGAACCAA | GCATTAGCTTCAGATTTACGGGT |
| <i>Icam1</i>                   | GTGATGCTCAGGTATCCATCCA  | CACAGTTCTCAAAGCACAGCG   |
| <i>Vcam1</i>                   | AGTTGGGGATTTCGGTTGTTCT  | CCCCTCATTCCCTTACCACCC   |
